# Supplementary material for: Dual control of NAD+ synthesis by purine metabolites in yeast
Source: eLife journal article supplement (doi:10.7554/elife.43808), 2019-03-12
Supplement: supp [file elife_poa_e43808_Figure_2_figure_supplement_2_source_data_1.pdf › elife_poa_e43808_Figure_2_figure_supplement_2_source_data_1.pdf]

Figure 2\_figure supplement 2B  
FY4 prototrophic cells grown in SDcasaWU medium ± Adenine

|                    | - Ade | - Ade | - Ade | - Ade | - Ade | - Ade | - Ade | - Ade | + Ade | + Ade | + Ade | + Ade | + Ade | + Ade | + Ade | + Ade | Mean  | Mean  | SD    | SD    | Unpaired t-test |
|--------------------|-------|-------|-------|-------|-------|-------|-------|-------|-------|-------|-------|-------|-------|-------|-------|-------|-------|-------|-------|-------|-----------------|
|                    | - Ade | - Ade | - Ade | - Ade | - Ade | - Ade | - Ade | - Ade | + Ade | + Ade | + Ade | + Ade | + Ade | + Ade | + Ade | + Ade | - Ade | + Ade | - Ade | + Ade | - Ade vs + Ade  |
| Median cell volume | 44.9  | 49.3  | 50.1  | 47.8  | 47.7  | 49.5  | 49.4  | 49.1  | 55.3  | 55.8  | 53.9  | 54    | 55.4  | 54.7  | 55.5  | 55.9  | 51.13 | 54.90 | 3.49  | 0.83  | 1.5E-06         |

|              |
|--------------|
| p>0.05       |
| 0.05<p>0.01  |
| 0.01<p>0.001 |
| p<0.001      |
