# Supplementary material for: Dual control of NAD+ synthesis by purine metabolites in yeast
Source: eLife journal article supplement (doi:10.7554/elife.43808), 2019-03-12
Supplement: supp [file elife_poa_e43808_Figure_2_figure_supplement_5_source_data_1.pdf › elife_poa_e43808_Figure_2_figure_supplement_5_source_data_1.pdf]

Figure 2 \_ figure supplement 5

Different wild-type strains grown in SDcasaWU ± Adenine medium

Peak area

|                   | - Ade | - Ade  | - Ade | - Ade | - Ade | - Ade | - Ade | - Ade | - Ade | + Ade  | + Ade | + Ade | + Ade  | + Ade | + Ade | + Ade | + Ade | + Ade  | Mean   | Mean  | SD    | SD      | Unpaired t-Test |
|-------------------|-------|--------|-------|-------|-------|-------|-------|-------|-------|--------|-------|-------|--------|-------|-------|-------|-------|--------|--------|-------|-------|---------|-----------------|
| Metabolite/Strain | - Ade | - Ade  | - Ade | - Ade | - Ade | - Ade | - Ade | - Ade | - Ade | + Ade  | + Ade | + Ade | + Ade  | + Ade | + Ade | + Ade | + Ade | + Ade  | - Ade  | + Ade | - Ade | + Ade   | - Ade vs + Ade  |
| ATP/WT1           | 363.2 | 382.9  | 369.9 | 378.5 | 363.2 | 382.9 | 359   | 359   | 384   | 410.3  | 410.2 | 411   | 392    | 410.3 | 410.2 | 440   | 422   | 371.40 | 413.25 | 10.71 | 13.55 | 8.1E-06 |                 |
| ATP/WT2           | 353.2 | 359.11 | 366.4 | 381.5 | 364.5 | 352.4 |       |       |       | 417.96 | 452   | 416.4 | 415.6  | 422   | 430.2 |       |       | 362.85 | 425.69 | 10.77 | 13.96 | 8.2E-06 |                 |
| ATP/WT3           | 401.9 | 322.6  | 376.8 | 353.5 | 358.3 | 364.2 |       |       |       | 449.4  | 454.2 | 423.7 | 435.54 | 428.8 | 424   |       |       | 362.88 | 435.94 | 26.27 | 13.10 | 4.1E-04 |                 |
|                   |       |        |       |       |       |       |       |       |       |        |       |       |        |       |       |       |       |        |        |       |       |         |                 |
| NAD+/WT1          | 9.2   | 10.45  | 11.39 | 11.15 | 10.6  | 10.43 | 10.62 | 10.15 | 9.97  | 11.09  | 11.3  | 11.6  | 11.1   | 11.09 | 11.27 | 11.62 | 11.97 | 10.44  | 11.38  | 0.64  | 0.32  | 2.2E-03 |                 |
| NAD+/WT2          | 15.58 | 22.43  | 18.87 | 23.63 | 20.4  | 22.1  |       |       |       | 23.95  | 25.66 | 25.57 | 25.8   | 25.6  | 28.7  |       |       | 20.50  | 25.88  | 2.93  | 1.54  | 4.6E-03 |                 |
| NAD+/WT3          | 20.77 | 21.12  | 22.1  | 22.5  | 22.81 | 23.7  |       |       |       | 23.42  | 27.2  | 24.6  | 26.5   | 28.72 | 28.57 |       |       | 22.17  | 26.50  | 1.09  | 2.14  | 2.6E-03 |                 |

Relative peak area (mean peak area from cells grown in the presence of adenine was set at 1 and used to calculate the relative peak areas)

|                   |       |       |       |       |       |       |       |       |       |       |       |       |       |       |       |       |       |       | Mean  | Mean  | SD    | SD      | Unpaired t-Test |
|-------------------|-------|-------|-------|-------|-------|-------|-------|-------|-------|-------|-------|-------|-------|-------|-------|-------|-------|-------|-------|-------|-------|---------|-----------------|
| Metabolite/Strain | - Ade | - Ade | - Ade | - Ade | - Ade | - Ade | - Ade | - Ade | - Ade | + Ade | + Ade | + Ade | + Ade | + Ade | + Ade | + Ade | + Ade | + Ade | - Ade | + Ade | - Ade | + Ade   | - Ade vs + Ade  |
| ATP/WT1           | 0.88  | 0.93  | 0.90  | 0.92  | 0.88  | 0.93  | 0.87  | 0.87  | 0.93  | 0.99  | 0.99  | 0.99  | 0.95  | 0.99  | 0.99  | 1.06  | 1.02  | 0.90  | 1.00  | 0.03  | 0.03  | 8.1E-06 |                 |
| ATP/WT2           | 0.83  | 0.84  | 0.86  | 0.90  | 0.86  | 0.83  |       |       |       | 0.98  | 1.06  | 0.98  | 0.98  | 0.99  | 1.01  |       |       | 0.85  | 1.00  | 0.03  | 0.03  | 8.2E-06 |                 |
| ATP/WT3           | 0.92  | 0.74  | 0.86  | 0.81  | 0.82  | 0.84  |       |       |       | 1.03  | 1.04  | 0.97  | 1.00  | 0.98  | 0.97  |       |       | 0.83  | 1.00  | 0.06  | 0.03  | 4.1E-04 |                 |
|                   |       |       |       |       |       |       |       |       |       |       |       |       |       |       |       |       |       |       |       |       |       |         |                 |
| NAD+/WT1          | 0.81  | 0.92  | 1.00  | 0.98  | 0.93  | 0.92  | 0.93  | 0.89  | 0.88  | 0.97  | 0.99  | 1.02  | 0.98  | 0.97  | 0.99  | 1.02  | 1.05  | 0.92  | 1.00  | 0.06  | 0.03  | 2.2E-03 |                 |
| NAD+/WT2          | 0.60  | 0.87  | 0.73  | 0.91  | 0.79  | 0.85  |       |       |       | 0.93  | 0.99  | 0.99  | 1.00  | 0.99  | 1.11  |       |       | 0.79  | 1.00  | 0.11  | 0.06  | 4.6E-03 |                 |
| NAD+/WT3          | 0.78  | 0.80  | 0.83  | 0.85  | 0.86  | 0.89  |       |       |       | 0.88  | 1.03  | 0.93  | 1.00  | 1.08  | 1.08  |       |       | 0.84  | 1.00  | 0.04  | 0.08  | 2.6E-03 |                 |

WT1 : FY4  
WT2: Y286  
WT3: BY4742

|              |
|--------------|
| p>0.05       |
| 0.05<p>0.01  |
| 0.01<p>0.001 |
| p<0.001      |
