# Supplementary material for: Dual control of NAD+ synthesis by purine metabolites in yeast
Source: eLife journal article supplement (doi:10.7554/elife.43808), 2019-03-12
Supplement: supp [file elife_poa_e43808_Figure_2_source_data_1.pdf › elife_poa_e43808_Figure_2_source_data_1.pdf]

**Figure 2, Figure 2\_figure supplement 3 and Figure3\_figure supplement 3**

FY4 wild-type strain grown in SDcasaWU ± Adenine medium

**Figure 2 and Figure 2- figure supplement 3**

**Peak area**

|                   |                                   | - Ade  | - Ade  | - Ade  | - Ade  | - Ade  | - Ade  | - Ade  | - Ade  | + Ade  | + Ade  | + Ade  | + Ade  | + Ade  | + Ade  | Mean   | Mean   | SD    | SD    | Unpaired             |
|-------------------|-----------------------------------|--------|--------|--------|--------|--------|--------|--------|--------|--------|--------|--------|--------|--------|--------|--------|--------|-------|-------|----------------------|
|                   | Metabolite (wavelength)           | - Ade  | - Ade  | - Ade  | - Ade  | - Ade  | - Ade  | - Ade  | - Ade  | + Ade  | + Ade  | + Ade  | + Ade  | + Ade  | + Ade  | - Ade  | + Ade  | - Ade | + Ade | T-test -Ade vs + Ade |
| Purines           | Adenine (269 nm)                  | 0.59   | 0.39   | 0.15   | 0.38   | 0.24   | 0.27   | 0.32   |        | 13.80  | 10.80  | 10.80  | 8.30   | 8.90   | 10.30  | 0.33   | 10.48  | 0.14  | 1.92  | 4.7E-05              |
|                   | Adenosine (260 nm)                | 0.31   | 0.31   | 0.27   | 0.28   | 0.24   | 0.23   |        | 0.27   | 0.70   | 0.64   | 0.63   | 0.56   | 0.60   |        | 0.27   | 0.63   | 0.03  | 0.05  | 1.1E-05              |
|                   | ADP (260 nm)                      | 49.20  | 43.40  | 34.30  | 40.02  | 37.15  | 48.00  | 47.80  |        | 33.85  | 43.20  | 40.91  | 40.87  | 42.00  | 44.60  | 42.84  | 40.91  | 5.85  | 3.74  | 4.9E-01              |
|                   | AMP (260 nm)                      | 7.81   | 6.30   | 6.20   | 6.90   | 6.70   | 6.10   | 7.20   | 8.00   | 5.00   | 5.50   | 6.50   |        | 6.00   | 6.40   |        | 5.88   | 0.72  | 0.63  | 2.4E-02              |
|                   | ATP (260 nm)                      | 369.90 | 378.50 | 363.20 | 382.90 | 359.00 | 359.00 | 384.00 | 381.00 | 410.30 | 410.20 | 440.00 | 422.00 | 411.00 | 392.00 | 372.19 | 414.25 | 10.73 | 15.88 | 4.4E-04              |
|                   | GDP (260 nm)                      | 39.35  | 40.50  | 36.47  | 40.20  | 38.50  | 40.20  | 46.60  | 45.50  | 38.60  | 36.70  | 40.80  | 34.75  | 39.80  | 37.60  | 40.92  | 38.04  | 3.43  | 2.18  | 8.1E-02              |
|                   | GTP (260 nm)                      | 81.20  | 88.40  | 79.50  | 80.40  | 78.90  | 78.20  | 83.60  | 90.40  | 77.30  | 82.60  | 85.80  | 84.90  | 77.30  | 77.40  | 82.58  | 80.88  | 4.55  | 4.03  | 4.8E-01              |
|                   | guanosine (260 nm)                | 0.32   | 0.25   | 0.13   | 0.23   | 0.14   | 0.14   | 0.30   | 0.24   | 0.74   | 0.73   | 0.84   | 0.86   | 1.02   | 1.08   | 0.22   | 0.88   | 0.07  | 0.14  | 1.9E-05              |
|                   | Hypoxanthine (260 nm)             | 2.03   | 2.64   | 2.61   | 2.72   | 2.00   | 2.90   |        |        | 12.60  | 15.80  | 10.95  | 10.75  | 11.54  | 10.80  | 2.48   | 12.07  | 0.38  | 1.95  | 4.8E-05              |
|                   | Inosine (254 nm)                  | 1.07   | 0.64   | 0.52   | 1.10   | 0.47   | 0.48   | 0.59   | 0.40   | 4.75   | 4.72   | 5.17   | 4.42   | 4.20   | 4.54   | 0.66   | 4.63   | 0.27  | 0.33  | 7.0E-10              |
|                   | SZMP (269 nm)                     | 3.63   | 3.32   | 2.82   | 3.67   | 4.06   | 3.75   | 5.09   | 4.60   | 0.04   | 0.05   | 0.13   | 0.18   | 0.09   | 0.08   | 3.87   | 0.09   | 0.71  | 0.05  | 1.3E-06              |
|                   | ZMP (269 nm)                      |        | 1.95   | 1.75   | 1.53   | 1.69   | 1.75   | 2.52   | 2.85   | 0.18   | 0.18   | 0.23   | 0.27   | 0.18   | 0.26   | 2.01   | 0.22   | 0.49  | 0.04  | 6.4E-05              |
| Pyrimidines       | CDP (260 nm)                      | 1.80   | 1.80   | 1.80   | 1.60   | 2.30   | 1.76   | 2.21   | 2.21   |        | 1.96   | 1.95   | 1.77   | 1.79   | 1.90   | 1.94   | 1.87   | 0.26  | 0.09  | 5.6E-01              |
|                   | CMP (260 nm)                      | 1.58   | 1.38   | 1.23   | 1.47   | 1.07   | 1.50   | 1.54   | 1.64   | 1.80   | 1.75   | 1.50   | 1.45   | 1.43   | 1.33   | 1.43   | 1.54   | 0.19  | 0.19  | 2.8E-01              |
|                   | CTP (260 nm)                      | 44.30  | 43.60  | 40.89  | 42.33  | 39.90  | 40.84  | 44.50  | 45.20  | 43.74  | 43.84  | 43.90  |        | 44.20  | 43.30  | 42.70  | 43.80  | 1.98  | 0.33  | 1.7E-01              |
|                   | Cytidine (260 nm)                 | 0.51   | 0.49   | 0.54   | 0.60   | 0.62   | 0.60   | 0.75   | 0.85   | 0.82   | 0.73   | 0.79   | 0.66   | 0.84   | 0.77   | 0.62   | 0.77   | 0.12  | 0.07  | 1.4E-02              |
|                   | UDP (260 nm)                      | 27.10  | 31.90  | 28.30  | 32.50  | 30.50  | 33.20  | 30.60  |        | 30.90  | 33.20  | 30.30  |        | 32.50  | 31.70  | 30.59  | 31.72  | 2.22  | 1.17  | 2.8E-01              |
|                   | UDP-N-acetyl-glucosamine (260 nm) | 31.80  | 29.80  | 29.60  | 30.20  | 26.70  | 27.80  | 29.20  | 32.00  | 34.70  | 32.20  | 31.60  | 32.60  | 29.20  | 29.50  | 29.64  | 31.63  | 1.80  | 2.06  | 8.7E-02              |
|                   | Uracil (260 nm)                   | 2.25   | 2.17   | 1.93   | 1.24   | 1.14   | 2.09   | 2.32   | 2.38   | 4.61   | 4.50   | 4.06   | 3.60   | 3.70   | 3.90   | 1.94   | 4.06   | 0.48  | 0.42  | 1.7E-06              |
|                   | UTP (260 nm)                      | 72.40  | 77.40  | 64.42  | 65.30  | 69.90  | 70.20  | 80.30  | 80.80  | 65.30  | 73.40  | 70.50  |        | 72.30  | 71.10  | 72.59  | 70.52  | 6.36  | 3.12  | 4.5E-01              |
| Pyridines         | 3-hydroxy-Anthranilate (360 nm)   | 0.20   | 0.15   | 0.14   | 0.16   | 0.14   | 0.19   | 0.20   | 0.18   | 0.04   | 0.04   | 0.06   | 0.07   | 0.04   | 0.03   | 0.17   | 0.05   | 0.03  | 0.01  | 1.6E-07              |
|                   | 3-hydroxy-Kynurenine (390 nm)     | 0.36   | 0.36   | 0.30   | 0.34   | 0.30   | 0.31   | 0.27   | 0.26   | 0.11   | 0.10   | 0.07   | 0.06   | 0.07   | 0.06   | 0.31   | 0.08   | 0.04  | 0.02  | 7.7E-09              |
|                   | Kynurenine (360 nm)               | 0.46   | 0.46   | 0.39   | 0.43   | 0.39   | 0.42   | 0.46   | 0.47   | 0.20   | 0.21   | 0.25   | 0.25   | 0.21   | 0.21   | 0.43   | 0.22   | 0.03  | 0.02  | 8.9E-09              |
|                   | NAD <sup>+</sup> (260 nm)         | 9.20   | 10.45  | 11.05  | 10.85  | 10.60  | 10.48  | 10.42  | 9.97   | 11.09  | 11.30  | 11.60  | 11.10  | 11.97  | 11.27  | 10.38  | 11.39  | 0.57  | 0.34  | 1.5E-03              |
|                   | NADH (340 nm)                     | 33.90  | 36.05  | 33.90  | 34.30  | 38.30  | 33.24  | 36.54  | 35.90  | 38.70  | 40.80  | 30.99  | 30.96  | 30.60  | 35.60  | 35.27  | 34.61  | 1.72  | 4.44  | 7.4E-01              |
|                   | NADPH (340 nm)                    | 6.10   | 5.45   | 4.90   | 6.20   | 6.23   | 5.25   | 5.36   | 6.50   | 5.60   | 5.20   | 4.68   | 5.90   | 4.60   | 6.20   | 5.75   | 5.36   | 0.58  | 0.65  | 2.8E-01              |
|                   | Nicotinic acid (260 nm)           | 2.82   | 2.73   | 1.98   | 2.38   | 2.07   | 2.38   | 2.84   | 2.89   | 1.70   | 1.88   | 1.44   | 1.42   | 1.76   | 1.99   | 2.51   | 1.70   | 0.36  | 0.23  | 2.6E-04              |
|                   |                                   |        |        |        |        |        |        |        |        |        |        |        |        |        |        |        |        |       |       |                      |
| Aminoacids        | Phenylalanine (260 nm)            | 1.76   | 1.76   | 1.43   | 1.77   | 1.46   | 1.69   | 1.80   | 1.70   | 1.73   | 1.75   | 2.28   | 2.08   | 1.64   | 1.68   | 1.67   | 1.86   | 0.14  | 0.26  | 1.5E-01              |
|                   | Tryptophan (280 nm)               | 36.80  | 35.20  | 31.60  | 33.40  | 31.80  | 33.80  | 36.40  | 37.40  | 46.30  | 47.30  | 48.92  | 43.88  | 44.60  | 44.90  | 34.55  | 45.98  | 2.24  | 1.90  | 3.0E-07              |
|                   | Tyrosine (295 nm)                 | 8.57   | 8.17   | 8.25   | 8.44   | 8.40   | 8.80   | 8.46   | 8.70   | 9.86   | 9.50   |        | 9.30   | 8.40   | 9.30   | 8.47   | 9.27   | 0.21  | 0.54  | 2.6E-02              |
| Other metabolites |                                   |        |        |        |        |        |        |        |        |        |        |        |        |        |        |        |        |       |       |                      |
|                   | Fumarate (260 nm)                 | 1.85   | 1.50   | 1.78   | 1.82   | 1.48   | 1.52   | 1.48   | 1.63   | 0.58   | 0.44   | 0.48   | 0.47   | 0.44   | 0.47   | 1.63   | 0.48   | 0.16  | 0.05  | 1.8E-08              |
|                   | Thiamine (340 nm)                 | 5.90   | 5.79   | 4.37   | 5.11   | 4.16   | 4.94   | 5.75   | 5.79   | 4.77   | 5.03   | 4.87   |        | 4.72   | 4.96   | 5.23   | 4.87   | 0.69  | 0.13  | 1.9E-01              |
|                   | Thiamine pyrophosphate (280 nm)   | 12.20  | 11.90  | 11.20  | 12.00  | 10.79  | 11.70  | 11.90  | 12.40  | 11.10  | 11.60  | 13.52  | 11.08  | 11.30  | 11.04  | 11.76  | 11.61  | 0.53  | 0.96  | 7.3E-01              |

Non-determinable for technical reasons  
mostly due to co-elution  
in some samples

p>0.05  
0.05<p>0.01  
0.01<p>0.001  
p<0.001

**Figure 2 and Figure 2- figure supplement 3**

**Relative peak area** (mean peak area from cells grown in the presence of adenine was set at 1 and used to calculate the relative peak areas)

|         |              | - Ade | - Ade | - Ade | - Ade | - Ade | - Ade | - Ade | - Ade | + Ade | + Ade | + Ade | + Ade | + Ade | + Ade | Mean  | Mean  | SD    | SD    | Unpaired             |
|---------|--------------|-------|-------|-------|-------|-------|-------|-------|-------|-------|-------|-------|-------|-------|-------|-------|-------|-------|-------|----------------------|
|         | Metabolite   | - Ade | - Ade | - Ade | - Ade | - Ade | - Ade | - Ade | - Ade | + Ade | + Ade | + Ade | + Ade | + Ade | + Ade | - Ade | + Ade | - Ade | + Ade | T-test -Ade vs + Ade |
| Purines | Adenine      | 0.06  | 0.04  | 0.01  | 0.04  | 0.02  | 0.03  | 0.03  |       | 1.32  | 1.03  | 1.03  | 0.79  | 0.85  | 0.98  | 0.03  | 1.00  | 0.01  | 0.18  | 4.7E-05              |
|         | Adenosine    | 0.50  | 0.49  | 0.43  | 0.45  | 0.38  | 0.37  |       | 0.43  | 1.12  | 1.02  | 1.00  | 0.89  | 0.96  |       | 0.44  | 1.00  | 0.05  | 0.08  | 1.1E-05              |
|         | ADP          | 1.20  | 1.06  | 0.84  | 0.98  | 0.91  | 1.17  | 1.17  |       | 0.83  | 1.06  | 1.00  | 1.00  | 1.03  | 1.09  | 1.05  | 1.00  | 0.14  | 0.09  | 4.9E-01              |
|         | AMP          | 1.33  | 1.07  | 1.05  | 1.17  | 1.14  | 1.04  | 1.22  | 1.36  | 0.85  | 0.94  | 1.11  |       | 1.02  | 1.09  | 1.17  | 1.00  | 0.12  | 0.11  | 2.4E-02              |
|         | ATP          | 0.89  | 0.91  | 0.88  | 0.92  | 0.87  | 0.87  | 0.93  | 0.92  | 0.99  | 0.99  | 1.06  | 1.02  | 0.99  | 0.95  | 0.90  | 1.00  | 0.03  | 0.04  | 4.4E-04              |
|         | GDP          | 1.03  | 1.06  | 0.96  | 1.06  | 1.01  | 1.06  | 1.22  | 1.20  | 1.01  | 0.96  | 1.07  | 0.91  | 1.05  | 0.99  | 1.08  | 1.00  | 0.09  | 0.06  | 8.1E-02              |
|         | GTP          | 1.00  | 1.09  | 0.98  | 0.99  | 0.98  | 0.97  | 1.03  | 1.12  | 0.96  | 1.02  | 1.06  | 1.05  | 0.96  | 0.96  | 1.02  | 1.00  | 0.06  | 0.05  | 4.8E-01              |
|         | guanosine    | 0.36  | 0.28  | 0.14  | 0.27  | 0.16  | 0.16  | 0.34  | 0.27  | 0.85  | 0.83  | 0.96  | 0.98  | 1.16  | 1.23  | 0.25  | 1.00  | 0.08  | 0.16  | 1.9E-05              |
|         | Hypoxanthine | 0.17  | 0.22  | 0.22  | 0.23  | 0.17  | 0.24  |       |       | 1.04  | 1.31  | 0.91  | 0.89  | 0.96  | 0.89  | 0.21  | 1.00  | 0.03  | 0.16  | 4.8E-05              |
|         | Inosine      | 0.23  | 0.14  | 0.11  | 0.24  | 0.10  | 0.10  | 0.13  | 0.09  | 1.03  | 1.02  | 1.12  | 0.95  | 0.91  | 0.98  | 0.14  | 1.00  | 0.06  | 0.07  | 7.0E-10              |
|         | SZMP         | 39.17 | 35.83 | 30.43 | 39.60 | 43.81 | 40.47 | 54.93 | 49.64 | 0.43  | 0.55  | 1.35  | 1.89  | 0.93  | 0.85  | 41.74 | 1.00  | 7.71  | 0.54  | 1.3E-06              |

|                   |                          |      |      |      |      |      |      |       |       |      |      |      |      |      |      |      |      |      |      |         |
|-------------------|--------------------------|------|------|------|------|------|------|-------|-------|------|------|------|------|------|------|------|------|------|------|---------|
| Pyrimidines       | ZMP                      |      | 9.03 | 8.10 | 7.08 | 7.82 | 8.10 | 11.67 | 13.19 | 0.85 | 0.81 | 1.06 | 1.25 | 0.81 | 1.20 | 9.29 | 1.00 | 2.27 | 0.20 | 6.4E-05 |
|                   | CDP                      | 0.96 | 0.96 | 0.96 | 0.85 | 1.23 | 0.94 | 1.18  | 1.18  |      | 1.05 | 1.04 | 0.94 | 0.96 | 1.01 | 1.03 | 1.00 | 0.14 | 0.05 | 5.6E-01 |
|                   | CMP                      | 1.02 | 0.89 | 0.80 | 0.95 | 0.69 | 0.97 | 1.00  | 1.06  | 1.17 | 1.13 | 0.97 | 0.94 | 0.93 | 0.86 | 0.92 | 1.00 | 0.12 | 0.12 | 2.8E-01 |
|                   | CTP                      | 1.01 | 1.00 | 0.93 | 0.97 | 0.91 | 0.93 | 1.02  | 1.03  | 1.00 | 1.00 | 1.00 |      | 1.01 | 0.99 | 0.97 | 1.00 | 0.05 | 0.01 | 1.7E-01 |
|                   | Cytidine                 | 0.67 | 0.64 | 0.70 | 0.78 | 0.81 | 0.78 | 0.98  | 1.11  | 1.07 | 0.95 | 1.03 | 0.86 | 1.09 | 1.00 | 0.81 | 1.00 | 0.16 | 0.09 | 1.4E-02 |
|                   | UDP                      | 0.85 | 1.01 | 0.89 | 1.02 | 0.96 | 1.05 | 0.96  |       | 0.97 | 1.05 | 0.96 |      | 1.02 | 1.00 | 0.96 | 1.00 | 0.07 | 0.04 | 2.8E-01 |
|                   | UDP-N-acetyl-glucosamine | 1.01 | 0.94 | 0.94 | 0.95 | 0.84 | 0.88 | 0.92  | 1.01  | 1.10 | 1.02 | 1.00 | 1.03 | 0.92 | 0.93 | 0.94 | 1.00 | 0.06 | 0.06 | 8.7E-02 |
|                   | Uracil                   | 0.55 | 0.53 | 0.48 | 0.31 | 0.28 | 0.51 | 0.57  | 0.59  | 1.14 | 1.11 | 1.00 | 0.89 | 0.91 | 0.96 | 0.48 | 1.00 | 0.12 | 0.10 | 1.7E-06 |
|                   | UTP                      | 1.03 | 1.10 | 0.91 | 0.93 | 0.99 | 1.00 | 1.14  | 1.15  | 0.93 | 1.04 | 1.00 |      | 1.03 | 1.01 | 1.03 | 1.00 | 0.09 | 0.04 | 4.5E-01 |
|                   |                          |      |      |      |      |      |      |       |       |      |      |      |      |      |      |      |      |      |      |         |
| Pyridines         | 3-hydroxy-Anthranilate   | 4.36 | 3.20 | 2.95 | 3.46 | 3.03 | 4.04 | 4.19  | 3.93  | 0.79 | 0.88 | 1.28 | 1.45 | 0.90 | 0.70 | 3.64 | 1.00 | 0.55 | 0.30 | 1.6E-07 |
|                   | 3-hydroxy-Kynurenine     | 4.54 | 4.54 | 3.81 | 4.29 | 3.79 | 3.91 | 3.48  | 3.29  | 1.39 | 1.27 | 0.88 | 0.81 | 0.87 | 0.78 | 3.96 | 1.00 | 0.47 | 0.26 | 7.7E-09 |
|                   | Kynurenine               | 2.08 | 2.08 | 1.75 | 1.94 | 1.74 | 1.91 | 2.08  | 2.12  | 0.90 | 0.95 | 1.14 | 1.13 | 0.96 | 0.93 | 1.96 | 1.00 | 0.15 | 0.10 | 8.9E-09 |
|                   | NAD+                     | 0.81 | 0.92 | 0.97 | 0.95 | 0.93 | 0.92 | 0.91  | 0.88  | 0.97 | 0.99 | 1.02 | 0.97 | 1.05 | 0.99 | 0.91 | 1.00 | 0.05 | 0.03 | 1.5E-03 |
|                   | NADH                     | 0.98 | 1.04 | 0.98 | 0.99 | 1.11 | 0.96 | 1.06  | 1.04  | 1.12 | 1.18 | 0.90 | 0.89 | 0.88 | 1.03 | 1.02 | 1.00 | 0.05 | 0.13 | 7.4E-01 |
|                   | NADPH                    | 1.14 | 1.02 | 0.91 | 1.16 | 1.16 | 0.98 | 1.00  | 1.21  | 1.04 | 0.97 | 0.87 | 1.10 | 0.86 | 1.16 | 1.07 | 1.00 | 0.11 | 0.12 | 2.8E-01 |
|                   | Nicotinic acid           | 1.66 | 1.61 | 1.17 | 1.40 | 1.22 | 1.40 | 1.67  | 1.70  | 1.00 | 1.11 | 0.85 | 0.84 | 1.04 | 1.17 | 1.48 | 1.00 | 0.21 | 0.14 | 2.6E-04 |
|                   |                          |      |      |      |      |      |      |       |       |      |      |      |      |      |      |      |      |      |      |         |
|                   | Phenylalanine            | 0.95 | 0.95 | 0.77 | 0.95 | 0.78 | 0.91 | 0.97  | 0.91  | 0.93 | 0.94 | 1.23 | 1.12 | 0.88 | 0.90 | 0.90 | 1.00 | 0.08 | 0.14 | 1.5E-01 |
|                   | Tryptophan               | 0.80 | 0.77 | 0.69 | 0.73 | 0.69 | 0.74 | 0.79  | 0.81  | 1.01 | 1.03 | 1.06 | 0.95 | 0.97 | 0.98 | 0.75 | 1.00 | 0.05 | 0.04 | 3.0E-07 |
| Aminoacids        | Tyrosine                 | 0.92 | 0.88 | 0.89 | 0.91 | 0.91 | 0.95 | 0.91  | 0.94  | 1.06 | 1.02 |      | 1.00 | 0.91 | 1.00 | 0.91 | 1.00 | 0.02 | 0.06 | 2.6E-02 |
|                   |                          |      |      |      |      |      |      |       |       |      |      |      |      |      |      |      |      |      |      |         |
| Other metabolites | Fumarate                 | 3.85 | 3.13 | 3.71 | 3.79 | 3.08 | 3.17 | 3.08  | 3.40  | 1.21 | 0.92 | 1.00 | 0.98 | 0.92 | 0.98 | 3.40 | 1.00 | 0.33 | 0.11 | 1.9E-08 |
|                   | Thiamine                 | 1.21 | 1.19 | 0.90 | 1.05 | 0.85 | 1.01 | 1.18  | 1.19  | 0.98 | 1.03 | 1.00 |      | 0.97 | 1.02 | 1.07 | 1.00 | 0.14 | 0.03 | 1.9E-01 |
|                   | Thyamine pyrophosphate   | 1.05 | 1.03 | 0.96 | 1.03 | 0.93 | 1.01 | 1.03  | 1.07  | 0.96 | 1.00 | 1.16 | 0.95 | 0.97 | 0.95 | 1.01 | 1.00 | 0.05 | 0.08 | 7.3E-01 |

Non-determinable for technical reasons  
mostly due to co-elution  
in some samples

p>0.05  
0.05<p>0.01  
0.01<p>0.001  
p<0.001

Figure 3\_supplement 3

## Content (nmol)

|     | - Ade   | - Ade   | - Ade | - Ade  | - Ade   | - Ade  | - Ade   | - Ade | + Ade   | + Ade   | + Ade   | + Ade | + Ade   | + Ade   | Mean  | Mean  | SD    | SD    | Unpaired             |
|-----|---------|---------|-------|--------|---------|--------|---------|-------|---------|---------|---------|-------|---------|---------|-------|-------|-------|-------|----------------------|
|     | - Ade   | - Ade   | - Ade | - Ade  | - Ade   | - Ade  | - Ade   | - Ade | + Ade   | + Ade   | + Ade   | + Ade | + Ade   | + Ade   | - Ade | + Ade | - Ade | + Ade | T-test -Ade vs + Ade |
| ATP | 19.27   | 19.71   | 18.92 | 19.94  | 18.70   | 18.70  | 20.00   | 19.84 | 21.37   | 21.36   | 22.92   | 21.98 | 21.41   | 20.42   | 0.04  | 0.05  | 0.00  | 0.00  | 4.4E-04              |
| ADP | 2.93    | 2.58    | 2.04  | 2.38   | 2.21    | 2.86   | 2.85    |       | 2.01    | 2.57    | 2.44    | 2.43  | 2.50    | 2.65    | 0.00  | 0.00  | 0.00  | 0.00  | 4.9E-01              |
| AMP | 0.40    | 0.32    | 0.32  | 0.36   | 0.35    | 0.31   | 0.37    | 0.41  | 0.26    | 0.28    | 0.34    |       | 0.31    | 0.33    | 0.18  | 0.05  | 0.02  | 0.01  | 2.4E-02              |
| AXP | 22.60   | 22.62   | 21.28 | 22.68  | 21.25   | 21.87  | 23.22   |       | 23.64   | 24.22   | 25.69   |       | 24.22   | 23.40   | 22.22 | 24.23 | 0.76  | 0.89  | 3.5E-03              |
| AEC | 0.91738 | 0.92855 | 0.937 | 0.9318 | 0.93173 | 0.9203 | 0.92274 |       | 0.94649 | 0.93521 | 0.93956 |       | 0.93561 | 0.92918 | 0.93  | 0.94  | 0.01  | 0.01  | 2.9E-02              |

## Relative content (mean AXP content from cells grown in the presence of adenine was set at 1 and used to calculate relative content)

|     | - Ade | - Ade | - Ade | - Ade | - Ade | - Ade | - Ade | - Ade | + Ade | + Ade | + Ade | + Ade | + Ade | + Ade | Mean  | Mean  | SD    | SD    | Unpaired             |
|-----|-------|-------|-------|-------|-------|-------|-------|-------|-------|-------|-------|-------|-------|-------|-------|-------|-------|-------|----------------------|
|     | - Ade | - Ade | - Ade | - Ade | - Ade | - Ade | - Ade | - Ade | + Ade | + Ade | + Ade | + Ade | + Ade | + Ade | - Ade | + Ade | - Ade | + Ade | T-test -Ade vs + Ade |
| AXP | 0.93  | 0.93  | 0.88  | 0.94  | 0.88  | 0.90  | 0.96  |       | 0.98  | 1.00  | 1.06  |       | 1.00  | 0.97  | 0.92  | 1.00  | 0.03  | 0.04  | 3.5E-03              |

nmol/peak area unit (determined with pure compounds as described in the Material and Methods section)

|     |      |
|-----|------|
| ATP | 19.2 |
| ADP | 16.8 |
| AMP | 19.4 |

Non-determinable for technical reasons  
mostly due to co-elution  
in some samples

p>0.05  
0.05<p>0.01  
0.01<p>0.001  
p<0.001
