# Supplementary material for: Dual control of NAD+ synthesis by purine metabolites in yeast
Source: eLife journal article supplement (doi:10.7554/elife.43808), 2019-03-12
Supplement: supp [file elife_poa_e43808_Figure_3_figure_supplement_1_source_data_1.pdf › elife_poa_e43808_Figure_3_figure_supplement_1_source_data_1.pdf]

Figure 3\_figure supplement 1

Wild-type and mutant strains grown in SDcasaWU ± Adenine medium

Peak area

| Metabolite/Strain | - Ade | - Ade | - Ade | - Ade | - Ade | - Ade | + Ade | + Ade | + Ade | + Ade | + Ade | + Ade | Mean  | Mean  | SD    | SD    | Unpaired t-Test | Unpaired t-Test          | Unpaired t-Test          |
|-------------------|-------|-------|-------|-------|-------|-------|-------|-------|-------|-------|-------|-------|-------|-------|-------|-------|-----------------|--------------------------|--------------------------|
|                   | - Ade | - Ade | - Ade | - Ade | - Ade | - Ade | + Ade | + Ade | + Ade | + Ade | + Ade | + Ade | - Ade | + Ade | - Ade | + Ade | - Ade vs + Ade  | mutant - Ade vs WT - Ade | mutant + Ade vs WT + Ade |
| NADH/WT           | 32.6  | 34.3  | 30.7  | 37.5  | 33.4  | 32.2  | 30.7  | 34.6  | 33.2  | 37.5  | 35.7  | 35.2  | 33.45 | 34.48 | 2.32  | 2.33  | 4.6E-01         |                          |                          |
| NADH/ <i>adk1</i> | 17.2  | 15.1  | 15.6  | 15    | 14.8  | 16.5  | 17.3  | 14.8  | 19.3  | 14.3  | 16.4  |       | 15.70 | 16.42 | 0.95  | 2.01  | 4.9E-01         | 8.9E-07                  | 2.4E-07                  |
| NADH/ <i>kcs1</i> | 39.4  | 53.6  |       | 48.7  | 43.3  | 53.6  | 40.5  | 40.8  | 42.3  | 49.6  | 48.3  | 45.6  | 47.72 | 44.52 | 6.30  | 3.90  | 3.6E-01         | 5.1E-03                  | 6.0E-04                  |

Non-determinable for technical reasons  
mostly due to co-elution  
in some samples

Relative peak area (mean peak area from cells grown in the presence of adenine was set at 1 and used to calculate the relative peak areas)

| Metabolite/Strain | - Ade  | - Ade  | - Ade  | - Ade  | - Ade  | - Ade  | + Ade  | + Ade  | + Ade  | + Ade  | + Ade  | + Ade  | Mean  | Mean  | SD    | SD    | Unpaired t-Test | Unpaired t-Test          | Unpaired t-Test          |
|-------------------|--------|--------|--------|--------|--------|--------|--------|--------|--------|--------|--------|--------|-------|-------|-------|-------|-----------------|--------------------------|--------------------------|
|                   | - Ade  | - Ade  | - Ade  | - Ade  | - Ade  | - Ade  | + Ade  | + Ade  | + Ade  | + Ade  | + Ade  | + Ade  | - Ade | + Ade | - Ade | + Ade | - Ade vs + Ade  | mutant - Ade vs WT - Ade | mutant + Ade vs WT + Ade |
| NADH/WT           | 0.9454 | 0.9947 | 0.8903 | 1.0875 | 0.9686 | 0.9338 | 0.8903 | 1.0034 | 0.9628 | 1.0875 | 1.0353 | 1.0208 | 0.97  | 1.00  | 0.07  | 0.07  | 4.6E-01         |                          |                          |
| NADH/ <i>adk1</i> | 0.4988 | 0.4379 | 0.4524 | 0.435  | 0.4292 | 0.4785 | 0.5017 | 0.4292 | 0.5597 | 0.4147 | 0.4756 |        | 0.46  | 0.48  | 0.03  | 0.06  | 4.9E-01         | 8.9E-07                  | 2.4E-07                  |
| NADH/ <i>kcs1</i> | 1.1426 | 1.5544 |        | 1.4123 | 1.2557 | 1.5544 | 1.1745 | 1.1832 | 1.2267 | 1.4384 | 1.4007 | 1.3224 | 1.38  | 1.29  | 0.18  | 0.11  | 3.6E-01         | 5.1E-03                  | 6.0E-04                  |

Non-determinable for technical reasons  
mostly due to co-elution  
in some samples

|              |
|--------------|
| p>0.05       |
| 0.05<p>0.01  |
| 0.01<p>0.001 |
| p<0.001      |
