# Supplementary material for: Dual control of NAD+ synthesis by purine metabolites in yeast
Source: eLife journal article supplement (doi:10.7554/elife.43808), 2019-03-12
Supplement: supp [file elife_poa_e43808_Figure_3_figure_supplement_2_source_data_1.pdf › elife_poa_e43808_Figure_3_figure_supplement_2_source_data_1.pdf]

## Figure 3- figure supplement 2 A-B

WT and *prs3* knock-out strains grown in SDcasaWU ± Adenine medium

### Peak area

| Metabolite/Strain | - Ade | - Ade | - Ade | - Ade | + Ade | + Ade | + Ade | + Ade | Mean   | Mean   | SD    | SD    | Unpaired t-Test | Unpaired t-Test          | Unpaired t-Test          |
|-------------------|-------|-------|-------|-------|-------|-------|-------|-------|--------|--------|-------|-------|-----------------|--------------------------|--------------------------|
|                   | - Ade | - Ade | - Ade | - Ade | + Ade | + Ade | + Ade | + Ade | - Ade  | + Ade  | - Ade | + Ade | - Ade vs + Ade  | mutant - Ade vs WT - Ade | mutant + Ade vs WT + Ade |
| ATP/WT            | 163.1 | 160.2 | 163.9 | 164.6 | 178.7 | 177.5 | 176.4 | 178   | 162.95 | 177.65 | 1.93  | 0.97  | 9.0E-05         |                          |                          |
| ATP/ <i>prs3</i>  | 48.2  | 52.05 | 68.4  | 69.8  | 97.3  | 98.1  | 120.6 | 110.6 | 59.61  | 106.65 | 11.08 | 11.12 | 9.7E-04         | 2.4E-04                  | 9.7E-04                  |

| Metabolite/Strain              | - Ade | - Ade | - Ade | - Ade | + Ade | + Ade | + Ade | + Ade | Mean  | Mean  | SD    | SD    | Unpaired t-Test | Unpaired t-Test          | Unpaired t-Test          |
|--------------------------------|-------|-------|-------|-------|-------|-------|-------|-------|-------|-------|-------|-------|-----------------|--------------------------|--------------------------|
|                                | - Ade | - Ade | - Ade | - Ade | + Ade | + Ade | + Ade | + Ade | - Ade | + Ade | - Ade | + Ade | - Ade vs + Ade  | mutant - Ade vs WT - Ade | mutant + Ade vs WT + Ade |
| NAD <sup>+</sup> /WT           | 4.82  | 5.1   | 5.7   | 5.7   | 6.1   | 6.3   | 7     | 6.6   | 5.33  | 6.50  | 0.44  | 0.39  | 7.7E-03         |                          |                          |
| NAD <sup>+</sup> / <i>prs3</i> | 1.92  | 2.5   | 2.8   | 2.85  | 3.99  | 4.3   | 4.2   | 4.7   | 2.52  | 4.30  | 0.43  | 0.30  | 7.7E-04         | 9.7E-05                  | 1.6E-04                  |

**Relative peak area** (mean peak area from cells grown in the presence of adenine was set at 1 and used to calculate the relative peak areas)

| Metabolite/Strain | - Ade | - Ade | - Ade | - Ade | + Ade | + Ade | + Ade | + Ade | Mean  | Mean  | SD    | SD    | Unpaired t-Test | Unpaired t-Test          | Unpaired t-Test          |
|-------------------|-------|-------|-------|-------|-------|-------|-------|-------|-------|-------|-------|-------|-----------------|--------------------------|--------------------------|
|                   | - Ade | - Ade | - Ade | - Ade | + Ade | + Ade | + Ade | + Ade | - Ade | + Ade | - Ade | + Ade | - Ade vs + Ade  | mutant - Ade vs WT - Ade | mutant + Ade vs WT + Ade |
| ATP/WT            | 0.92  | 0.90  | 0.92  | 0.93  | 1.01  | 1.00  | 0.99  | 1.00  | 0.92  | 1.00  | 0.01  | 0.01  | 9.0E-05         |                          |                          |
| ATP/ <i>prs3</i>  | 0.27  | 0.29  | 0.39  | 0.39  | 0.55  | 0.55  | 0.68  | 0.62  | 0.34  | 0.60  | 0.06  | 0.06  | 9.7E-04         | 2.4E-04                  | 9.7E-04                  |

| Metabolite/Strain              | - Ade | - Ade | - Ade | - Ade | + Ade | + Ade | + Ade | + Ade | Mean  | Mean  | SD    | SD    | Unpaired t-Test | Unpaired t-Test          | Unpaired t-Test          |
|--------------------------------|-------|-------|-------|-------|-------|-------|-------|-------|-------|-------|-------|-------|-----------------|--------------------------|--------------------------|
|                                | - Ade | - Ade | - Ade | - Ade | + Ade | + Ade | + Ade | + Ade | - Ade | + Ade | - Ade | + Ade | - Ade vs + Ade  | mutant - Ade vs WT - Ade | mutant + Ade vs WT + Ade |
| NAD <sup>+</sup> /WT           | 0.74  | 0.78  | 0.88  | 0.88  | 0.94  | 0.97  | 1.08  | 1.02  | 0.82  | 1.00  | 0.07  | 0.06  | 7.7E-03         |                          |                          |
| NAD <sup>+</sup> / <i>prs3</i> | 0.30  | 0.38  | 0.43  | 0.44  | 0.61  | 0.66  | 0.65  | 0.72  | 0.39  | 0.66  | 0.07  | 0.05  | 7.7E-04         | 9.7E-05                  | 1.6E-04                  |

|              |
|--------------|
| p>0.05       |
| 0.05<p>0.01  |
| 0.01<p>0.001 |
| p<0.001      |
