# Supplementary material for: Dual control of NAD+ synthesis by purine metabolites in yeast
Source: eLife journal article supplement (doi:10.7554/elife.43808), 2019-03-12
Supplement: supp [file elife_poa_e43808_Figure_3_figure_supplement_2_source_data_2.pdf › elife_poa_e43808_Figure_3_figure_supplement_2_source_data_2.pdf]

## Figure 3\_figure supplement 2 C-D

FY4 wild-type strain grown in SD medium containing either 100  $\mu\text{M}$  or 7.34 mM (concentration commonly supplied in SD medium) of inorganic phosphate (Pi)

### Peak area

|                                     | Sample 1 | Sample 2 | Sample 3 | Sample 4 | Sample 5 | Sample 6 | Mean  | SD  | Unpaired t-Test<br>7340 vs 100 $\mu\text{M}$ Pi |
|-------------------------------------|----------|----------|----------|----------|----------|----------|-------|-----|-------------------------------------------------|
| Metabolite / [Pi] ( $\mu\text{M}$ ) |          |          |          |          |          |          |       |     |                                                 |
| ATP / 100                           | 99.9     | 90.4     | 82.9     | 89.9     | 80.2     | 99.5     | 90.5  | 8.2 | 1.7E-05                                         |
| ATP / 7340                          | 110.4    | 131.4    | 127.5    | 131.2    | 128.3    | 128.4    | 126.2 | 7.9 |                                                 |

|                                     | Sample 1 | Sample 2 | Sample 3 | Sample 4 | Sample 5 | Sample 6 | Mean | SD  | Unpaired t-Test<br>7340 vs 100 $\mu\text{M}$ Pi |
|-------------------------------------|----------|----------|----------|----------|----------|----------|------|-----|-------------------------------------------------|
| Metabolite / [Pi] ( $\mu\text{M}$ ) |          |          |          |          |          |          |      |     |                                                 |
| NAD+ / 100                          | 4.1      | 4.4      | 4.5      | 4.6      | 4.4      | 5.0      | 4.5  | 0.3 | 9.5E-06                                         |
| NAD+ / 7340                         | 6.5      | 8.2      | 7.8      | 7.3      | 7.5      | 7.1      | 7.4  | 0.6 |                                                 |

**Relative peak area** (mean peak area from cells grown in the presence 7.34 mM Pi was set at 1 and used to calculate the relative peak areas)

|                                     | Sample 1 | Sample 2 | Sample 3 | Sample 4 | Sample 5 | Sample 6 | Mean | SD  | Unpaired t-Test<br>7340 vs 100 $\mu\text{M}$ Pi |
|-------------------------------------|----------|----------|----------|----------|----------|----------|------|-----|-------------------------------------------------|
| Metabolite / [Pi] ( $\mu\text{M}$ ) |          |          |          |          |          |          |      |     |                                                 |
| ATP / 100                           | 0.8      | 0.7      | 0.7      | 0.7      | 0.6      | 0.8      | 0.7  | 0.1 | 1.7E-05                                         |
| ATP / 7340                          | 0.9      | 1.0      | 1.0      | 1.0      | 1.0      | 1.0      | 1.0  | 0.1 |                                                 |

|                                     | Sample 1 | Sample 2 | Sample 3 | Sample 4 | Sample 5 | Sample 6 | Mean | SD  | Unpaired t-Test<br>7340 vs 100 $\mu\text{M}$ Pi |
|-------------------------------------|----------|----------|----------|----------|----------|----------|------|-----|-------------------------------------------------|
| Metabolite / [Pi] ( $\mu\text{M}$ ) |          |          |          |          |          |          |      |     |                                                 |
| NAD+ / 100                          | 0.6      | 0.6      | 0.6      | 0.6      | 0.6      | 0.7      | 0.6  | 0.0 | 9.5E-06                                         |
| NAD+ / 7340                         | 0.9      | 1.1      | 1.1      | 1.0      | 1.0      | 1.0      | 1.0  | 0.1 |                                                 |

p>0.05

0.05<p>0.01

0.01<p>0.001

p<0.001
