# Supplementary material for: Dual control of NAD+ synthesis by purine metabolites in yeast
Source: eLife journal article supplement (doi:10.7554/elife.43808), 2019-03-12
Supplement: supp [file elife_poa_e43808_Figure_3_figure_supplement_4_source_data_1.pdf › elife_poa_e43808_Figure_3_figure_supplement_4_source_data_1.pdf]

## Figure 3\_figure supplement 4

FY4 wild-type strain grown in SGE(Glycerol Ethanol)casaWU ± Adenine medium

### Peak area

| Metabolite | - Ade | - Ade | - Ade | - Ade | - Ade | - Ade | - Ade | + Ade | + Ade | + Ade | + Ade | + Ade | + Ade | + Ade | + Ade | Mean<br>- Ade | Mean<br>+ Ade | SD<br>- Ade | SD<br>+ Ade | Unpaired t-Test<br>- Ade vs + Ade |
|------------|-------|-------|-------|-------|-------|-------|-------|-------|-------|-------|-------|-------|-------|-------|-------|---------------|---------------|-------------|-------------|-----------------------------------|
| ATP        | 155.0 | 161.0 | 165.6 | 163.8 | 163.2 | 158.0 | 163.6 | 197.0 | 193.8 | 197.6 | 189.5 | 220.2 | 193.0 | 208.3 | 211.2 | 161.5         | 201.3         | 3.7         | 10.7        | 4.3E-06                           |
| NAD+       | 4.7   | 5.1   | 4.2   | 4.4   | 5.0   | 5.1   | 5.4   | 5.5   | 6.1   | 5.2   | 5.5   | 6.2   | 6.2   | 6.2   | 6.4   | 4.8           | 5.9           | 0.4         | 0.4         | 3.3E-04                           |
| ADP        | 36.9  | 34.8  | 40.7  | 40.8  | 38.8  | 42.1  | 43.3  | 45.7  | 44.5  | 44.6  | 46.1  | 50.2  | 46.4  | 46.0  | 50.8  | 39.6          | 46.8          | 3.0         | 2.4         |                                   |
| AMP        | 10.4  | 8.9   | 9.4   | 8.9   | 8.7   | 9.7   | 10.3  | 12.5  | 12.8  | 9.5   | 10.7  | 10.9  | 9.7   | 9.9   | 11.4  | 9.5           | 10.9          | 0.7         | 1.2         |                                   |

### Relative peak area (mean peak area from cells grown in the presence of adenine was set at 1 and used to calculate the relative peak areas)

| Metabolite | - Ade | - Ade | - Ade | - Ade | - Ade | - Ade | - Ade | + Ade | + Ade | + Ade | + Ade | + Ade | + Ade | + Ade | + Ade | Mean<br>- Ade | Mean<br>+ Ade | SD<br>- Ade | SD<br>+ Ade | Unpaired t-Test<br>- Ade vs + Ade |
|------------|-------|-------|-------|-------|-------|-------|-------|-------|-------|-------|-------|-------|-------|-------|-------|---------------|---------------|-------------|-------------|-----------------------------------|
| ATP        | 0.8   | 0.8   | 0.8   | 0.8   | 0.8   | 0.8   | 0.8   | 1.0   | 1.0   | 1.0   | 0.9   | 1.1   | 1.0   | 1.0   | 1.0   | 0.8           | 1.0           | 0.0         | 0.1         | 4.3E-06                           |
| NAD+       | 0.8   | 0.9   | 0.7   | 0.7   | 0.8   | 0.9   | 0.9   | 0.9   | 1.0   | 0.9   | 0.9   | 1.0   | 1.0   | 1.0   | 1.1   | 0.8           | 1.0           | 0.1         | 0.1         | 3.3E-04                           |
| ADP        | 0.8   | 0.7   | 0.9   | 0.9   | 0.8   | 0.9   | 0.9   | 1.0   | 1.0   | 1.0   | 1.0   | 1.1   | 1.0   | 1.0   | 1.1   | 0.8           | 1.0           | 0.1         | 0.1         |                                   |
| AMP        | 1.0   | 0.8   | 0.9   | 0.8   | 0.8   | 0.9   | 0.9   | 1.1   | 1.2   | 0.9   | 1.0   | 1.0   | 0.9   | 0.9   | 1.0   | 0.9           | 1.0           | 0.1         | 0.1         |                                   |

### Content

(nmol)

| Metabolite | - Ade | - Ade | - Ade | - Ade | - Ade | - Ade | - Ade | + Ade | + Ade | + Ade | + Ade | + Ade | + Ade | + Ade | + Ade | Mean<br>- Ade | Mean<br>+ Ade | SD<br>- Ade | SD<br>+ Ade | Unpaired t-Test<br>- Ade vs + Ade |
|------------|-------|-------|-------|-------|-------|-------|-------|-------|-------|-------|-------|-------|-------|-------|-------|---------------|---------------|-------------|-------------|-----------------------------------|
| ATP        | 8.07  | 8.39  | 8.63  | 8.53  | 8.50  | 8.23  | 8.52  | 10.26 | 10.09 | 10.29 | 9.87  | 11.47 | 10.05 | 10.85 | 11.00 | 8.4           | 10.5          | 0.2         | 0.6         | 4.3E-06                           |
| ADP        | 2.19  | 2.07  | 2.42  | 2.43  | 2.31  | 2.51  | 2.58  | 2.72  | 2.65  | 2.65  | 2.74  | 2.99  | 2.76  | 2.74  | 3.02  | 2.4           | 2.8           | 0.2         | 0.1         |                                   |
| AMP        | 0.54  | 0.46  | 0.48  | 0.46  | 0.45  | 0.50  | 0.53  | 0.65  | 0.66  | 0.49  | 0.55  | 0.56  | 0.50  | 0.51  | 0.59  | 0.5           | 0.6           | 0.0         | 0.1         |                                   |
| AXP        | 10.80 | 10.92 | 11.53 | 11.42 | 11.26 | 11.24 | 11.63 | 13.62 | 13.40 | 13.44 | 13.16 | 15.02 | 13.31 | 14.10 | 14.61 | 11.3          | 13.8          | 0.3         | 0.7         |                                   |
| AEC        | 0.85  | 0.86  | 0.85  | 0.85  | 0.86  | 0.84  | 0.84  | 0.85  | 0.85  | 0.86  | 0.85  | 0.86  | 0.86  | 0.86  | 0.87  | 0.9           | 0.9           | 0.0         | 0.0         | 7.5E-02                           |

### Relative content (mean AXP content from cells grown in the presence of adenine was set at 1 and used to calculate relative content)

|     | - Ade | - Ade | - Ade | - Ade | - Ade | - Ade | - Ade | + Ade | + Ade | + Ade | + Ade | + Ade | + Ade | + Ade | + Ade | Mean<br>- Ade | Mean<br>+ Ade | SD<br>- Ade | SD<br>+ Ade | Unpaired t-Test<br>- Ade vs + Ade |
|-----|-------|-------|-------|-------|-------|-------|-------|-------|-------|-------|-------|-------|-------|-------|-------|---------------|---------------|-------------|-------------|-----------------------------------|
| AXP | 0.78  | 0.79  | 0.83  | 0.83  | 0.81  | 0.81  | 0.84  | 0.98  | 0.97  | 0.97  | 0.95  | 1.09  | 0.96  | 1.02  | 1.06  | 0.8           | 1.0           | 0.0         | 0.0         | 2.0E-06                           |

nmol/peak area unit (determined with pure compounds as described in the Material and Methods section)

|     |      |
|-----|------|
| ATP | 19.2 |
| ADP | 16.8 |
| AMP | 19.4 |

|              |
|--------------|
| p>0.05       |
| 0.05<p>0.01  |
| 0.01<p>0.001 |
| p<0.001      |
