# Supplementary material for: Dual control of NAD+ synthesis by purine metabolites in yeast
Source: eLife journal article supplement (doi:10.7554/elife.43808), 2019-03-12
Supplement: supp [file elife_poa_e43808_Figure_3_figure_supplement_4_source_data_2.pdf › elife_poa_e43808_Figure_3_figure_supplement_4_source_data_2.pdf]

**Figure 3\_figure supplement 4E**  
FY4 prototrophic cells grown in SGEcasaWU medium ± Adenine

|                    |       |       |       |       |       |       |       |       |       |       |       |       | Mean  | Mean  | SD    | SD    | Unpaired t-test |
|--------------------|-------|-------|-------|-------|-------|-------|-------|-------|-------|-------|-------|-------|-------|-------|-------|-------|-----------------|
|                    | - Ade | - Ade | - Ade | - Ade | - Ade | - Ade | + Ade | + Ade | + Ade | + Ade | + Ade | + Ade | - Ade | + Ade | - Ade | + Ade | - Ade vs + Ade  |
| Median cell volume | 42    | 42.9  | 43.7  | 42.9  | 41.7  | 43    | 43    | 41    | 41    | 42.6  | 42.7  | 40.3  | 42.70 | 41.77 | 0.73  | 1.13  | 0.13            |

p>0.05

0.05<p>0.01

0.01<p>0.001

p<0.001
