# Supplementary material for: Dual control of NAD+ synthesis by purine metabolites in yeast
Source: eLife journal article supplement (doi:10.7554/elife.43808), 2019-03-12
Supplement: supp [file elife_poa_e43808_Figure_3_figure_supplement_5_source_data_1.pdf › elife_poa_e43808_Figure_3_figure_supplement_5_source_data_1.pdf]

## Figure 3\_figure supplement 5

Wild-type and mutant strains grown in SDcsaWU + Adenine medium

### Peak area

| Metabolite/Strain     | + Ade  | + Ade  | + Ade  | + Ade  | + Ade | + Ade | Mean<br>+ Ade | SD<br>+ Ade | Unpaired t-Test<br>WT vs mutant |
|-----------------------|--------|--------|--------|--------|-------|-------|---------------|-------------|---------------------------------|
| ATP/WT                | 449.4  | 454.2  | 423.7  | 435.54 | 428.8 | 424   | 435.94        | 13.10       |                                 |
| ATP/ <i>npt1</i>      | 435.7  | 454.4  | 441.4  | 447.8  | 432   | 458   | 444.88        | 10.33       | 2.2E-01                         |
| ATP/ <i>kcs1</i>      | 949.7  | 922    | 873.8  | 959.4  |       |       | 926.23        | 38.37       | 5.1E-05                         |
| ATP/ <i>npt1 kcs1</i> | 1141.9 | 1221.8 | 1037.4 | 1085   |       |       | 1121.53       | 79.33       | 3.5E-04                         |

| Metabolite/Strain                   | + Ade | + Ade | + Ade | + Ade | + Ade | + Ade | Mean<br>+ Ade | SD<br>+ Ade | Unpaired t-Test<br>WT vs mutant |
|-------------------------------------|-------|-------|-------|-------|-------|-------|---------------|-------------|---------------------------------|
| NAD <sup>+</sup> /WT                | 23.42 | 27.2  | 24.6  | 26.5  | 28.72 | 28.57 | 26.50         | 2.14        |                                 |
| NAD <sup>+</sup> / <i>npt1</i>      | 6.4   | 6.45  | 8.3   | 7.7   | 7.87  | 7.82  | 7.42          | 0.80        | 4.6E-07                         |
| NAD <sup>+</sup> / <i>kcs1</i>      | 34.99 | 39.9  | 36.4  | 36.22 |       |       | 36.88         | 2.11        | 1.7E-04                         |
| NAD <sup>+</sup> / <i>npt1 kcs1</i> | 5.95  | 4.72  | 5.35  | 5.38  |       |       | 5.35          | 0.50        | 5.9E-07                         |

**Relative peak area** (mean peak area from wild-type cells was set at 1 and used to calculate the relative peak areas)

| Metabolite/Strain     | + Ade | + Ade | + Ade | + Ade | + Ade | + Ade | Mean<br>+ Ade | SD<br>+ Ade | Unpaired t-Test<br>WT vs mutant |
|-----------------------|-------|-------|-------|-------|-------|-------|---------------|-------------|---------------------------------|
| ATP/WT                | 1.03  | 1.04  | 0.97  | 1.00  | 0.98  | 0.97  | 1.00          | 0.03        |                                 |
| ATP/ <i>npt1</i>      | 1.00  | 1.04  | 1.01  | 1.03  | 0.99  | 1.05  | 1.02          | 0.02        | 2.2E-01                         |
| ATP/ <i>kcs1</i>      | 2.18  | 2.11  | 2.00  | 2.20  |       |       | 2.12          | 0.09        | 5.1E-05                         |
| ATP/ <i>npt1 kcs1</i> | 2.62  | 2.80  | 2.38  | 2.49  |       |       | 2.57          | 0.18        | 3.5E-04                         |

| Metabolite/Strain                   | + Ade | + Ade | + Ade | + Ade | + Ade | + Ade | Mean<br>+ Ade | SD<br>+ Ade | Unpaired t-Test<br>WT vs mutant |
|-------------------------------------|-------|-------|-------|-------|-------|-------|---------------|-------------|---------------------------------|
| NAD <sup>+</sup> /WT                | 0.88  | 1.03  | 0.93  | 1.00  | 1.08  | 1.08  | 1.00          | 0.08        |                                 |
| NAD <sup>+</sup> / <i>npt1</i>      | 0.24  | 0.24  | 0.31  | 0.29  | 0.30  | 0.30  | 0.28          | 0.03        | 4.6E-07                         |
| NAD <sup>+</sup> / <i>kcs1</i>      | 1.32  | 1.51  | 1.37  | 1.37  |       |       | 1.39          | 0.08        | 1.7E-04                         |
| NAD <sup>+</sup> / <i>npt1 kcs1</i> | 0.22  | 0.18  | 0.20  | 0.20  |       |       | 0.20          | 0.02        | 5.9E-07                         |

|              |
|--------------|
| p>0.05       |
| 0.05<p>0.01  |
| 0.01<p>0.001 |
| p<0.001      |
