# Supplementary material for: Dual control of NAD+ synthesis by purine metabolites in yeast
Source: eLife journal article supplement (doi:10.7554/elife.43808), 2019-03-12
Supplement: supp [file elife_poa_e43808_Figure_3_source_data_1.pdf › elife_poa_e43808_Figure_3_source_data_1.pdf]

Figure 3 A-B  
Wild-type and mutant strains grown in SDCasaWU ± Adenine medium

Figure 3 A-B  
Peak area

| Metabolite/Strain | - Ade | - Ade | - Ade | - Ade | - Ade | - Ade | + Ade | + Ade | + Ade | + Ade | + Ade | + Ade | Mean   | Mean    | SD    | SD    | Unpaired t-Test | Unpaired t-Test          | Unpaired t-Test          |
|-------------------|-------|-------|-------|-------|-------|-------|-------|-------|-------|-------|-------|-------|--------|---------|-------|-------|-----------------|--------------------------|--------------------------|
|                   | - Ade | - Ade | - Ade | - Ade | - Ade | - Ade | + Ade | + Ade | + Ade | + Ade | + Ade | + Ade | - Ade  | + Ade   | - Ade | + Ade | - Ade vs + Ade  | mutant - Ade vs WT - Ade | mutant + Ade vs WT + Ade |
| ATP/WT1           | 413   | 399   | 377   | 401   | 382   | 401   | 467   | 465   | 466   | 480   | 456   | 452   | 395.50 | 464.33  | 13.44 | 9.77  | 2.8E-06         |                          |                          |
| ATP/ <i>adk1</i>  | 176   | 145   | 181   | 188   | 167   | 150   | 204   | 205   | 255   | 261   | 259   | 278   | 167.83 | 243.67  | 17.24 | 31.34 | 9.1E-04         | 3.0E-10                  | 3.4E-06                  |
| ATP/ <i>kcs1</i>  | 867   | 948   | 930   | 887   | 890   | 932   | 1025  | 1026  | 1031  | 1003  | 931   |       | 909.00 | 1003.20 | 31.94 | 41.78 | 3.8E-03         | 3.8E-06                  | 4.2E-06                  |
| NAD+/WT           | 18.27 |       | 21.08 | 17.16 | 21.9  | 21.3  |       | 26.1  | 27.4  | 29.9  | 24.3  | 23.9  | 19.94  | 26.32   | 2.09  | 2.45  | 2.3E-03         |                          |                          |
| NAD+/ <i>adk1</i> | 6.84  | 5.23  | 5.3   | 7.1   | 7.1   | 6.8   | 8.3   | 7.03  | 7.69  | 7.9   | 8.05  | 8.5   | 6.40   | 7.91    | 0.88  | 0.52  | 6.6E-03         | 3.1E-02                  | 4.7E-05                  |
| NAD+/ <i>kcs1</i> | 25.4  |       | 25.7  | 27.07 | 24.5  |       | 30.1  |       | 33.83 | 33.2  | 30.3  |       | 25.67  | 31.86   | 1.07  | 1.93  | 3.1E-03         | 1.7E-03                  | 6.8E-03                  |

Non-determinable for technical reasons  
mostly due to co-elution  
in some samples

Relative peak area (mean peak area from cells grown in the presence of adenine was set at 1 and used to calculate the relative peak areas)

Figure 3 A-B

| Metabolite/Strain | - Ade | - Ade | - Ade | - Ade | - Ade | - Ade | + Ade | + Ade | + Ade | + Ade | + Ade | + Ade | Mean  | Mean  | SD    | SD    | Unpaired t-Test | Unpaired t-Test          | Unpaired t-Test          |
|-------------------|-------|-------|-------|-------|-------|-------|-------|-------|-------|-------|-------|-------|-------|-------|-------|-------|-----------------|--------------------------|--------------------------|
|                   | - Ade | - Ade | - Ade | - Ade | - Ade | - Ade | + Ade | + Ade | + Ade | + Ade | + Ade | + Ade | - Ade | + Ade | - Ade | + Ade | - Ade vs + Ade  | mutant - Ade vs WT - Ade | mutant + Ade vs WT + Ade |
| ATP/WT1           | 0.89  | 0.86  | 0.81  | 0.86  | 0.82  | 0.86  | 1.01  | 1.00  | 1.00  | 1.03  | 0.98  | 0.97  | 0.85  | 1.00  | 0.03  | 0.02  | 2.8E-06         |                          |                          |
| ATP/ <i>adk1</i>  | 0.38  | 0.31  | 0.39  | 0.40  | 0.36  | 0.32  | 0.44  | 0.44  | 0.55  | 0.56  | 0.56  | 0.60  | 0.36  | 0.52  | 0.04  | 0.07  | 9.1E-04         | 3.0E-10                  | 3.4E-06                  |
| ATP/ <i>kcs1</i>  | 1.87  | 2.04  | 2.00  | 1.91  | 1.92  | 2.01  | 2.21  | 2.21  | 2.22  | 2.16  | 2.01  |       | 1.96  | 2.16  | 0.07  | 0.09  | 3.8E-03         | 3.8E-06                  | 4.2E-06                  |
| NAD+/WT           | 0.69  |       | 0.80  | 0.65  | 0.83  | 0.81  |       | 0.99  | 1.04  | 1.14  | 0.92  | 0.91  | 0.76  | 1.00  | 0.08  | 0.09  | 2.3E-03         |                          |                          |
| NAD+/ <i>adk1</i> | 0.26  | 0.20  | 0.20  | 0.27  | 0.27  | 0.26  | 0.32  | 0.27  | 0.29  | 0.30  | 0.31  | 0.32  | 0.24  | 0.30  | 0.03  | 0.02  | 6.6E-03         | 3.1E-02                  | 4.7E-05                  |
| NAD+/ <i>kcs1</i> | 0.97  |       | 0.98  | 1.03  | 0.93  |       | 1.14  |       | 1.29  | 1.26  | 1.15  |       | 0.98  | 1.21  | 0.04  | 0.07  | 3.1E-03         | 1.7E-03                  | 6.8E-03                  |

Non-determinable for technical reasons  
mostly due to co-elution  
in some samples

|              |
|--------------|
| p>0.05       |
| 0.05<p>0.01  |
| 0.01<p>0.001 |
| p<0.001      |
