# Supplementary material for: Dual control of NAD+ synthesis by purine metabolites in yeast
Source: eLife journal article supplement (doi:10.7554/elife.43808), 2019-03-12
Supplement: supp [file elife_poa_e43808_Figure_3_source_data_2.pdf › elife_poa_e43808_Figure_3_source_data_2.pdf]

### Figure 3 C-D

Wild-type and mutant strains grown in SDcasaWU + Adenine ± nicotinic acid medium

#### Peak area

| Metabolite/Strain | - NA  | - NA  | - NA  | - NA  | - NA  | - NA  | + NA  | + NA  | + NA  | + NA   | + NA  | + NA | Mean<br>- NA | Mean<br>+ NA | SD<br>- NA | SD<br>+ NA | Unpaired t-Test<br>- Ade vs + Ade |
|-------------------|-------|-------|-------|-------|-------|-------|-------|-------|-------|--------|-------|------|--------------|--------------|------------|------------|-----------------------------------|
| ATP/WT            | 387   | 337   | 381   | 373   |       |       | 390.3 | 383   | 387.9 | 387.43 |       |      | 369.50       | 387.16       | 22.41      | 3.04       | 2.1E-01                           |
| ATP/ <i>adk1</i>  | 153   | 163   | 152   | 161   |       |       | 138.5 | 150   | 139   | 118    |       |      | 157.25       | 136.38       | 5.56       | 13.35      | 4.5E-02                           |
| ATP/ <i>kcs1</i>  | 664.6 | 673.6 | 656.2 | 666.8 | 644.6 | 664.2 | 650.6 | 602.2 | 596   | 578    | 617.2 | 578  | 661.67       | 603.67       | 10.05      | 27.44      | 2.4E-03                           |
| NAD+/WT           | 10.98 | 7.2   | 7.55  | 8.34  |       |       | 22.1  | 21.71 | 21.2  | 21.75  |       |      | 8.52         | 21.69        | 1.71       | 0.37       | 3.8E-04                           |
| NAD+/ <i>adk1</i> | 9.2   | 7.1   | 6.2   | 6.9   |       |       | 10.8  | 7.03  | 6.8   | 6.9    |       |      | 7.35         | 7.88         | 1.29       | 1.95       | 6.7E-01                           |
| NAD+/ <i>kcs1</i> | 13.2  | 13.8  | 12    | 16.9  | 12.6  | 12    | 34.2  | 31    | 28.8  | 30.8   | 29.6  | 27.8 | 13.42        | 30.37        | 1.84       | 2.23       | 7.9E-08                           |

**Relative peak area** (mean peak area from cells grown in the presence of nicotinic acid was set at 1 and used to calculate the relative peak areas)

| Metabolite/Strain | - NA | - NA | - NA | - NA | - NA | - NA | + NA | + NA | + NA | + NA | + NA | + NA | Mean<br>- NA | Mean<br>+ NA | SD<br>- NA | SD<br>+ NA | Unpaired t-Test<br>- Ade vs + Ade |
|-------------------|------|------|------|------|------|------|------|------|------|------|------|------|--------------|--------------|------------|------------|-----------------------------------|
| ATP/WT            | 1.00 | 0.87 | 0.98 | 0.96 |      |      | 1.01 | 0.99 | 1.00 | 1.00 |      |      | 0.95         | 1.00         | 0.06       | 0.01       | 2.1E-01                           |
| ATP/ <i>adk1</i>  | 0.40 | 0.42 | 0.39 | 0.42 |      |      | 0.36 | 0.39 | 0.36 | 0.30 |      |      | 0.41         | 0.35         | 0.01       | 0.03       | 4.5E-02                           |
| ATP/ <i>kcs1</i>  | 1.72 | 1.74 | 1.69 | 1.72 | 1.66 | 1.72 | 1.68 | 1.56 | 1.54 | 1.49 | 1.59 | 1.49 | 1.71         | 1.56         | 0.03       | 0.07       | 2.4E-03                           |
| NAD+/WT           | 0.51 | 0.33 | 0.35 | 0.38 |      |      | 1.02 | 1.00 | 0.98 | 1.00 |      |      | 0.39         | 1.00         | 0.08       | 0.02       | 3.8E-04                           |
| NAD+/ <i>adk1</i> | 0.42 | 0.33 | 0.29 | 0.32 |      |      | 0.50 | 0.32 | 0.31 | 0.32 |      |      | 0.34         | 0.36         | 0.06       | 0.09       | 6.7E-01                           |
| NAD+/ <i>kcs1</i> | 0.61 | 0.64 | 0.55 | 0.78 | 0.58 | 0.55 | 1.58 | 1.43 | 1.33 | 1.42 | 1.36 | 1.28 | 0.62         | 1.40         | 0.09       | 0.10       | 7.9E-08                           |

-NA: - Nicotinic Acid

+ NA: + Nicotinic Ac.

|              |
|--------------|
| p>0.05       |
| 0.05<p>0.01  |
| 0.01<p>0.001 |
| p<0.001      |
