# Supplementary material for: Dual control of NAD+ synthesis by purine metabolites in yeast
Source: eLife journal article supplement (doi:10.7554/elife.43808), 2019-03-12
Supplement: supp [file elife_poa_e43808_Figure_4_figure_supplement_1_source_data_1.pdf › elife_poa_e43808_Figure_4_figure_supplement_1_source_data_1.pdf]

## Figure 4 \_ figure supplement 1 A

Wild-type cells (BY4742) grown in SDcasaWU and shifted at time 0 in SDcasaWU + Adenine

|       | Phosphorimager | Phosphorimager |                   |                   | Phosphorimager |                   |                   | Phosphorimager |                  |                  | Phosphorimager |                  |                  |
|-------|----------------|----------------|-------------------|-------------------|----------------|-------------------|-------------------|----------------|------------------|------------------|----------------|------------------|------------------|
| Time  | Quantification | Quantification |                   | Relative          | Quantification |                   | Relative          | Quantification |                  | Relative         | Quantification |                  | Relative         |
| (min) | <i>ACT1</i>    | <i>ADE17</i>   | <i>ADE17/ACT1</i> | <i>ADE17/ACT1</i> | <i>PHO84</i>   | <i>PHO84/ACT1</i> | <i>PHO84/ACT1</i> | <i>BNA6</i>    | <i>BNA6/ACT1</i> | <i>BNA6/ACT1</i> | <i>BNA4</i>    | <i>BNA4/ACT1</i> | <i>BNA4/ACT1</i> |
| 0     | 168            | 422            | 2.51              | <b>1.00</b>       | 719            | 4.28              | <b>1</b>          | 826            | 4.92             | <b>1.0</b>       | 49292          | 293.40           | <b>1.0</b>       |
| 10    | 167            | 130            | 0.78              | <b>0.31</b>       | 1031           | 6.17              | <b>1.4</b>        | 890            | 5.33             | <b>1.1</b>       | 52930          | 316.95           | <b>1.1</b>       |
| 20    | 200            | 22             | 0.11              | <b>0.04</b>       | 579            | 2.90              | <b>0.7</b>        | 884            | 4.42             | <b>0.9</b>       | 48199          | 241.00           | <b>0.8</b>       |
| 30    | 197            | 6              | 0.03              | <b>0.01</b>       | 450            | 2.28              | <b>0.5</b>        | 856            | 4.35             | <b>0.9</b>       | 41019          | 208.22           | <b>0.7</b>       |
| 45    | 212            | 14             | 0.07              | <b>0.03</b>       | 381            | 1.80              | <b>0.4</b>        | 637            | 3.00             | <b>0.6</b>       | 23187          | 109.37           | <b>0.4</b>       |
| 60    | 218            | 40             | 0.18              | <b>0.07</b>       | 415            | 1.90              | <b>0.4</b>        | 584            | 2.68             | <b>0.5</b>       | 24066          | 110.39           | <b>0.4</b>       |

## Figure 4 \_ figure supplement 1 B

Wild-type cells(BY4742) grown in SDcasaWU + Adenine and shifted at time 0 in SDcasaWU

|       | Phosphorimager | Phosphorimager |                   |                   | Phosphorimager |                   |                   | Phosphorimager |                  |                  | Phosphorimager |                  |                  |
|-------|----------------|----------------|-------------------|-------------------|----------------|-------------------|-------------------|----------------|------------------|------------------|----------------|------------------|------------------|
| Time  | Quantification | Quantification |                   | Relative          | Quantification |                   | Relative          | Quantification |                  | Relative         | Quantification |                  | Relative         |
| (min) | <i>ACT1</i>    | <i>ADE17</i>   | <i>ADE17/ACT1</i> | <i>ADE17/ACT1</i> | <i>PHO84</i>   | <i>PHO84/ACT1</i> | <i>PHO84/ACT1</i> | <i>BNA6</i>    | <i>BNA6/ACT1</i> | <i>BNA6/ACT1</i> | <i>BNA4</i>    | <i>BNA4/ACT1</i> | <i>BNA4/ACT1</i> |
| 0     | 181            | 71             | 0.39              | <b>1.0</b>        | 218            | 1.20              | <b>1.0</b>        | 2749           | 15.19            | <b>1.0</b>       | 21668          | 119.7127072      | <b>1.0</b>       |
| 10    | 225            | 848            | 3.77              | <b>9.6</b>        | 576            | 2.56              | <b>2.1</b>        | 5226           | 23.23            | <b>1.5</b>       | 28455          | 126.4666667      | <b>1.1</b>       |
| 20    | 233            | 1680           | 7.21              | <b>18.4</b>       | 608            | 2.61              | <b>2.2</b>        | 6442           | 27.65            | <b>1.8</b>       | 51927          | 222.8626609      | <b>1.9</b>       |
| 30    | 226            | 1588           | 7.03              | <b>17.9</b>       | 613            | 2.71              | <b>2.3</b>        | 8382           | 37.09            | <b>2.4</b>       | 56172          | 248.5486726      | <b>2.1</b>       |
| 45    | 213            | 829            | 3.89              | <b>9.9</b>        | 497            | 2.33              | <b>1.9</b>        | 9677           | 45.43            | <b>3.0</b>       | 63589          | 298.5399061      | <b>2.5</b>       |
| 60    | 208            | 699            | 3.36              | <b>8.6</b>        | 516            | 2.48              | <b>2.1</b>        | 10801          | 51.93            | <b>3.4</b>       | 60921          | 292.8894231      | <b>2.4</b>       |

Northern blot quantifications done with ImageQuant (GE Healthcare life sciences)
