# Supplementary material for: Dual control of NAD+ synthesis by purine metabolites in yeast
Source: eLife journal article supplement (doi:10.7554/elife.43808), 2019-03-12
Supplement: supp [file elife_poa_e43808_Figure_4_source_data_1.pdf › elife_poa_e43808_Figure_4_source_data_1.pdf]

**Figure 4 B**

Wild-type(BY4742) and *bas1 pho2* mutant cells were grown in SDcasaWU + Adenine and shifted at time 0 in SDcasaWU  
Northern blot quantifications done with ImageQuant (GE Healthcare life sciences)

| Strain           | Time (min) | Experiment | ACT1 | ADE17 | ADE17/ACT1 | Relative ADE17/ACT1 | BNA4 | BNA4 / ACT1 | Relative BNA4 / ACT1 | BNA6 | BNA6 / ACT1 | Relative BNA6 / ACT1 | PHO84 | PHO84 / ACT1 | Relative PHO84 / ACT1 |
|------------------|------------|------------|------|-------|------------|---------------------|------|-------------|----------------------|------|-------------|----------------------|-------|--------------|-----------------------|
| Wild-type        | 0          | 1          | 2996 | 1840  | 0.6        | 1.0                 | 278  | 0.09        | 1.0                  | 56   | 0.02        | 1.0                  | 8105  | 2.7          | 1.0                   |
|                  | 10         | 1          | 2711 | 22357 | 8.2        | 13.4                | 308  | 0.11        | 1.2                  | 52   | 0.02        | 1.0                  | 13349 | 4.9          | 1.8                   |
|                  | 20         | 1          | 3416 | 38059 | 11.1       | 18.1                | 749  | 0.22        | 2.4                  | 149  | 0.04        | 2.3                  | 20087 | 5.9          | 2.2                   |
|                  | 30         | 1          | 2973 | 24800 | 8.3        | 13.6                | 581  | 0.20        | 2.1                  | 114  | 0.04        | 2.1                  | 15960 | 5.4          | 2.0                   |
| Wild-type        | 0          | 2          | 3244 | 2422  | 0.7        | 1.0                 | 470  | 0.14        | 1.0                  | 53   | 0.02        | 1.0                  | 10205 | 3.1          | 1.0                   |
|                  | 10         | 2          | 2278 | 26882 | 11.8       | 15.8                | 427  | 0.19        | 1.3                  | 30   | 0.01        | 0.8                  | 15426 | 6.8          | 2.2                   |
|                  | 20         | 2          | 3262 | 44414 | 13.6       | 18.2                | 923  | 0.28        | 2.0                  | 100  | 0.03        | 1.9                  | 23130 | 7.1          | 2.3                   |
|                  | 30         | 2          | 3495 | 35220 | 10.1       | 13.5                | 987  | 0.28        | 1.9                  | 130  | 0.04        | 2.3                  | 22030 | 6.3          | 2.0                   |
| Wild-type        | 0          | 3          | 4701 | 4926  | 1.0        | 1.0                 | 62   | 0.01        | 1.0                  | 588  | 0.13        | 1.0                  | 29032 | 6.2          | 1.0                   |
|                  | 20         | 3          | 5166 | 93921 | 18.2       | 17.4                | 126  | 0.02        | 1.8                  | 1295 | 0.25        | 2.0                  | 65307 | 12.6         | 2.0                   |
|                  | 30         | 3          | 4098 | 48594 | 11.9       | 11.3                | 102  | 0.02        | 1.9                  | 1019 | 0.25        | 2.0                  | 45940 | 11.2         | 1.8                   |
|                  | 0          | 4          | 4235 | 5558  | 1.3        | 1.0                 | 62   | 0.01        | 1.0                  | 561  | 0.13        | 1.0                  | 22268 | 5.3          | 1.0                   |
| Wild-type        | 20         | 4          | 5012 | 94001 | 18.8       | 14.3                | 132  | 0.03        | 1.8                  | 1201 | 0.24        | 1.8                  | 52918 | 10.6         | 2.0                   |
|                  | 30         | 4          | 5058 | 71638 | 14.2       | 10.8                | 173  | 0.03        | 2.3                  | 1384 | 0.27        | 2.1                  | 57073 | 11.3         | 2.1                   |
| Strain           | Time (min) | Experiment | ACT1 | ADE17 | ADE17/ACT1 | Relative ADE17/ACT1 | BNA4 | BNA4 / ACT1 | Relative BNA4 / ACT1 | BNA6 | BNA6 / ACT1 | Relative BNA6 / ACT1 | PHO84 | PHO84 / ACT1 | Relative PHO84 / ACT1 |
| <i>bas1 pho2</i> | 0          | 1          | 3135 | 708   | 0.23       | 1.0                 | 292  | 0.09        | 1.0                  | 124  | 0.04        | 1.0                  | 7822  | 2.5          | 1.0                   |
|                  | 10         | 1          | 2753 | 554   | 0.20       | 0.9                 | 203  | 0.07        | 0.8                  | 65   | 0.02        | 0.6                  | 6201  | 2.3          | 0.9                   |
|                  | 20         | 1          | 3228 | 938   | 0.29       | 1.3                 | 392  | 0.12        | 1.3                  | 75   | 0.02        | 0.6                  | 7365  | 2.3          | 0.9                   |
|                  | 30         | 1          | 2578 | 860   | 0.33       | 1.5                 | 331  | 0.13        | 1.4                  | 65   | 0.03        | 0.6                  | 6686  | 2.6          | 1.0                   |
| <i>bas1 pho2</i> | 0          | 2          | 3644 | 1146  | 0.31       | 1.0                 | 465  | 0.13        | 1.0                  | 135  | 0.04        | 1.0                  | 9828  | 2.7          | 1.0                   |
|                  | 10         | 2          | 3252 | 948   | 0.29       | 0.9                 | 363  | 0.11        | 0.9                  | 98   | 0.03        | 0.8                  | 7391  | 2.3          | 0.8                   |
|                  | 20         | 2          | 3696 | 1498  | 0.41       | 1.3                 | 613  | 0.17        | 1.3                  | 107  | 0.03        | 0.8                  | 9018  | 2.4          | 0.9                   |
|                  | 30         | 2          | 3005 | 1313  | 0.44       | 1.4                 | 491  | 0.16        | 1.3                  | 93   | 0.03        | 0.8                  | 8642  | 2.9          | 1.1                   |
| <i>bas1 pho2</i> | 0          | 3          | 4016 | 1981  | 0.49       | 1.0                 | 77   | 0.02        | 1.0                  | 636  | 0.16        | 1.0                  | 16488 | 4.1          | 1.0                   |
|                  | 20         | 3          | 3559 | 1404  | 0.39       | 0.8                 | 63   | 0.02        | 0.9                  | 430  | 0.12        | 0.8                  | 11308 | 3.2          | 0.8                   |
|                  | 30         | 3          | 3112 | 1255  | 0.40       | 0.8                 | 73   | 0.02        | 1.2                  | 339  | 0.11        | 0.7                  | 11948 | 3.8          | 0.9                   |
|                  | 0          | 4          | 3693 | 1886  | 0.51       | 1.0                 | 75   | 0.02        | 1.0                  | 551  | 0.15        | 1.0                  | 8506  | 2.3          | 1.0                   |
| <i>bas1 pho2</i> | 20         | 4          | 3592 | 1587  | 0.44       | 0.9                 | 65   | 0.02        | 0.9                  | 420  | 0.12        | 0.8                  | 7083  | 2.0          | 0.9                   |
|                  | 30         | 4          | 3184 | 1275  | 0.40       | 0.8                 | 64   | 0.02        | 1.0                  | 306  | 0.10        | 0.6                  | 7154  | 2.2          | 1.0                   |

|            | Mean                | SD                  | Mean                | SD                  | Mean                 | SD                   | Mean                 | SD                   | Mean                 | SD                   | Mean                 | SD                   | Mean                  | SD                    | Mean                  | SD                    |
|------------|---------------------|---------------------|---------------------|---------------------|----------------------|----------------------|----------------------|----------------------|----------------------|----------------------|----------------------|----------------------|-----------------------|-----------------------|-----------------------|-----------------------|
|            | Relative ADE17/ACT1 | Relative ADE17/ACT1 | Relative ADE17/ACT1 | Relative ADE17/ACT1 | Relative BNA4 / ACT1 | Relative BNA4 / ACT1 | Relative BNA4 / ACT1 | Relative BNA4 / ACT1 | Relative BNA6 / ACT1 | Relative BNA6 / ACT1 | Relative BNA6 / ACT1 | Relative BNA6 / ACT1 | Relative PHO84 / ACT1 | Relative PHO84 / ACT1 | Relative PHO84 / ACT1 | Relative PHO84 / ACT1 |
| Time (min) | Wild-type           | Wild-type           | <i>bas1 pho2</i>    | <i>bas1 pho2</i>    | Wild-type            | Wild-type            | <i>bas1 pho2</i>     | <i>bas1 pho2</i>     | Wild-type            | Wild-type            | <i>bas1 pho2</i>     | <i>bas1 pho2</i>     | Wild-type             | Wild-type             | <i>bas1 pho2</i>      | <i>bas1 pho2</i>      |
| 0          | 1.0                 | 0.0                 | 1.0                 | 0.0                 | 1.0                  | 0.0                  | 1.0                  | 0.0                  | 1.0                  | 0.0                  | 1.0                  | 0.0                  | 1.0                   | 0.0                   | 1.0                   | 0.0                   |
| 10         | 14.6                | 1.7                 | 0.9                 | 0.0                 | 1.3                  | 0.0                  | 0.8                  | 0.1                  | 0.9                  | 0.2                  | 0.7                  | 0.2                  | 2.0                   | 0.2                   | 0.9                   | 0.0                   |
| 20         | 17.0                | 1.9                 | 1.1                 | 0.3                 | 2.0                  | 0.3                  | 1.1                  | 0.2                  | 2.0                  | 0.2                  | 0.7                  | 0.1                  | 2.1                   | 0.1                   | 0.9                   | 0.1                   |
| 30         | 12.3                | 1.5                 | 1.3                 | 0.4                 | 2.1                  | 0.2                  | 1.2                  | 0.2                  | 2.1                  | 0.1                  | 0.7                  | 0.1                  | 2.0                   | 0.1                   | 1.0                   | 0.1                   |
