# Supplementary material for: Dual control of NAD+ synthesis by purine metabolites in yeast
Source: eLife journal article supplement (doi:10.7554/elife.43808), 2019-03-12
Supplement: supp [file elife_poa_e43808_Figure_5_figure_supplement_1_source_data_1.pdf › elife_poa_e43808_Figure_5_figure_supplement_1_source_data_1.pdf]

Figure 5 \_ figure supplement 1

Wild-type (WT) and *ade16 ade17* mutant strains grown in SDcasaWU medium -Nicotinic acid + Adenine

Peak area

| Metabolite       | WT    | WT    | WT    | WT    | WT    | WT    | WT    | <i>ade16 ade17</i> | <i>ade16 ade17</i> | <i>ade16 ade17</i> | <i>ade16 ade17</i> | <i>ade16 ade17</i> | <i>ade16 ade17</i> | <i>ade16 ade17</i> | Mean  | Mean  | SD    | SD  | Unpaired t-test |
|------------------|-------|-------|-------|-------|-------|-------|-------|--------------------|--------------------|--------------------|--------------------|--------------------|--------------------|--------------------|-------|-------|-------|-----|-----------------|
| ATP              | 199.9 | 192.7 | 197.6 | 193.3 | 208   | 197   | 201.5 | 207.1              | 191.5              | 188.5              | 182                | 201                | 190                | 189.5              | 198.6 | 192.8 | 5.2   | 8.4 | 0.16            |
| NAD <sup>+</sup> | 3.1   | 3.27  | 3.5   | 3.6   | 3.4   | 3.48  | 3.9   | 4.3                | 5.04               | 4.2                | 3.8                | 4.56               | 4.63               | 4.6                | 3.5   | 4.4   | 0.3   | 0.4 | 2.2E-04         |
| ZMP              | 0.04  | 0.029 | 0.031 | 0.023 | 0.036 | 0.034 | 0.026 | 41.6               | 41.1               | 38.9               | 40.1               | 41.5               | 41.4               | 39.54              | 0.031 | 40.6  | 0.006 | 1.1 | 6.89E-11        |

Relative peak area (mean peak area from wild-type cells grown was set at 1 and used to calculate the relative peak areas)

| Metabolite       | WT   | WT   | WT   | WT   | WT   | WT   | WT   | <i>ade16 ade17</i> | <i>ade16 ade17</i> | <i>ade16 ade17</i> | <i>ade16 ade17</i> | <i>ade16 ade17</i> | <i>ade16 ade17</i> | <i>ade16 ade17</i> | Mean | Mean | SD        | SD          | Unpaired t-test |
|------------------|------|------|------|------|------|------|------|--------------------|--------------------|--------------------|--------------------|--------------------|--------------------|--------------------|------|------|-----------|-------------|-----------------|
| ATP              | 1.01 | 0.97 | 1.00 | 0.97 | 1.05 | 0.99 | 1.01 | 1.04               | 0.96               | 0.95               | 0.92               | 1.01               | 0.96               | 0.95               | 1.0  | 1.0  | 0.026402  | 0.04249755  | 0.16            |
| NAD <sup>+</sup> | 0.89 | 0.94 | 1.01 | 1.04 | 0.98 | 1.00 | 1.13 | 1.24               | 1.45               | 1.21               | 1.10               | 1.32               | 1.34               | 1.33               | 1.0  | 1.3  | 0.0730611 | 0.113188928 | 2.2E-04         |
| ZMP              | 1.28 | 0.93 | 0.99 | 0.74 | 1.15 | 1.09 | 0.83 | 1330               | 1314               | 1243               | 1282               | 1326               | 1323               | 1264               | 1.0  | 1297 | 0.1879371 | 34.43334157 | 6.89E-11        |

|              |
|--------------|
| p>0.05       |
| 0.05<p>0.01  |
| 0.01<p>0.001 |
| p<0.001      |
