# Supplementary material for: Dual control of NAD+ synthesis by purine metabolites in yeast
Source: eLife journal article supplement (doi:10.7554/elife.43808), 2019-03-12
Supplement: supp [file elife_poa_e43808_Figure_5_source_data_1.pdf › elife_poa_e43808_Figure_5_source_data_1.pdf]

**Figure 5 A-F, M-N**

WT, *ade16 ade17* and *ade16 ade17 ade8 his1* knock-out strains grown in SDcasaWU + Adenine medium

**Peak area**

| Metabolite/Strain                 | + Ade | + Ade | + Ade | + Ade | + Ade | + Ade | Mean  | SD   | Unpaired t-test                                          | Unpaired t-test                   |
|-----------------------------------|-------|-------|-------|-------|-------|-------|-------|------|----------------------------------------------------------|-----------------------------------|
|                                   |       |       |       |       |       |       |       |      | WT or <i>ade16 ade17 ade8 his1</i> vs <i>ade16 ade17</i> | WTvs <i>ade16 ade17 ade8 his1</i> |
| ZMP/ WT                           | 0.027 | 0.025 | 0.020 | 0.019 | 0.026 | 0.023 | 0.02  | 0.00 | 8.9E-09                                                  |                                   |
| ZMP/ <i>ade16 ade17</i>           | 55.0  | 55.5  | 57.2  | 59.7  | 56.0  | 54.6  | 56.33 | 1.88 |                                                          | 1.1E-05                           |
| ZMP/ <i>ade16 ade17 ade8 his1</i> | 0.0   | 0.0   | 0.0   | 0.0   | 0.0   | 0.0   | 0.00  | 0.00 | 8.8E-09                                                  |                                   |

0 stands for non-detectable

| Metabolite/Strain                  | + Ade | + Ade | + Ade | + Ade | + Ade | + Ade | Mean  | SD   | Unpaired t-test                                          | Unpaired t-test                   |
|------------------------------------|-------|-------|-------|-------|-------|-------|-------|------|----------------------------------------------------------|-----------------------------------|
|                                    |       |       |       |       |       |       |       |      | WT or <i>ade16 ade17 ade8 his1</i> vs <i>ade16 ade17</i> | WTvs <i>ade16 ade17 ade8 his1</i> |
| sZMP/ WT                           | 0.0   | 0.0   | 0.0   | 0.0   | 0.0   | 0.0   | 0.00  | 0.00 | 2.3E-07                                                  |                                   |
| SZMP/ <i>ade16 ade17</i>           | 16.0  | 17.8  | 16.8  | 17.8  | 16.0  | 15.2  | 16.60 | 1.06 |                                                          | Not Applicable                    |
| SZMP/ <i>ade16 ade17 ade8 his1</i> | 0.0   | 0.0   | 0.0   | 0.0   | 0.0   | 0.0   | 0.00  | 0.00 | 2.3E-07                                                  |                                   |

0 stands for non-detectable

| Metabolite/Strain                 | + Ade | + Ade | + Ade | + Ade | + Ade | + Ade | Mean  | SD  | Unpaired t-test                                          | Unpaired t-test                   |
|-----------------------------------|-------|-------|-------|-------|-------|-------|-------|-----|----------------------------------------------------------|-----------------------------------|
|                                   |       |       |       |       |       |       |       |     | WT or <i>ade16 ade17 ade8 his1</i> vs <i>ade16 ade17</i> | WTvs <i>ade16 ade17 ade8 his1</i> |
| ATP/ WT                           | 174.2 | 170.2 | 157.0 | 172.2 | 173.3 | 183.0 | 171.7 | 8.4 | 1.5E-01                                                  |                                   |
| ATP/ <i>ade16 ade17</i>           | 158.3 | 171.2 | 169.2 | 171.2 | 162.2 | 157.2 | 164.9 | 6.4 |                                                          | 3.8E-01                           |
| ATP/ <i>ade16 ade17 ade8 his1</i> | 165.7 | 148.5 | 175.5 | 168.3 | 168.3 | 174.5 | 166.8 | 9.8 | 7.0E-01                                                  |                                   |

| Metabolite/Strain                 | + Ade | + Ade | + Ade | + Ade | + Ade | + Ade | Mean  | SD   | Unpaired t-test                                          | Unpaired t-test                   |
|-----------------------------------|-------|-------|-------|-------|-------|-------|-------|------|----------------------------------------------------------|-----------------------------------|
|                                   |       |       |       |       |       |       |       |      | WT or <i>ade16 ade17 ade8 his1</i> vs <i>ade16 ade17</i> | WTvs <i>ade16 ade17 ade8 his1</i> |
| Trp/ WT                           | 15.8  | 14.7  | 14.0  | 15.1  | 14.9  | 15.8  | 15.06 | 0.69 | 7.0E-07                                                  |                                   |
| Trp/ <i>ade16 ade17</i>           | 10.2  | 10.9  | 11.0  | 11.2  | 10.3  | 10.5  | 10.68 | 0.42 |                                                          | 1.9E-01                           |
| Trp/ <i>ade16 ade17 ade8 his1</i> | 15.4  | 14.7  | 15.6  | 15.6  | 15.8  | 16.4  | 15.58 | 0.56 | 2.6E-08                                                  |                                   |

| Metabolite/Strain                        | + Ade | + Ade | + Ade | + Ade | + Ade | + Ade | Mean | SD   | Unpaired t-test                                          | Unpaired t-test                   |
|------------------------------------------|-------|-------|-------|-------|-------|-------|------|------|----------------------------------------------------------|-----------------------------------|
|                                          |       |       |       |       |       |       |      |      | WT or <i>ade16 ade17 ade8 his1</i> vs <i>ade16 ade17</i> | WTvs <i>ade16 ade17 ade8 his1</i> |
| Kynurenine/ WT                           | 0.23  | 0.20  | 0.17  | 0.24  | 0.17  | 0.20  | 0.20 | 0.03 | 1.5E-12                                                  |                                   |
| Kynurenine/ <i>ade16 ade17</i>           | 0.88  | 0.86  | 0.90  | 0.92  | 0.88  | 0.85  | 0.88 | 0.03 |                                                          | 5.1E-01                           |
| Kynurenine/ <i>ade16 ade17 ade8 his1</i> | 0.21  | 0.17  | 0.22  | 0.21  | 0.17  | 0.16  | 0.19 | 0.02 | 5.6E-13                                                  |                                   |

| Metabolite/Strain                             | + Ade | + Ade | + Ade | + Ade | + Ade | + Ade | Mean | SD   | Unpaired t-test                                          | Unpaired t-test                   |
|-----------------------------------------------|-------|-------|-------|-------|-------|-------|------|------|----------------------------------------------------------|-----------------------------------|
|                                               |       |       |       |       |       |       |      |      | WT or <i>ade16 ade17 ade8 his1</i> vs <i>ade16 ade17</i> | WTvs <i>ade16 ade17 ade8 his1</i> |
| 3-OH-Kynurenine/ WT                           | 0.070 | 0.063 | 0.053 | 0.034 | 0.040 | 0.060 | 0.05 | 0.01 | 7.0E-08                                                  |                                   |
| 3-OH-Kynurenine/ <i>ade16 ade17</i>           | 0.542 | 0.454 | 0.520 | 0.477 | 0.525 | 0.462 | 0.50 | 0.04 |                                                          | 1.1E-02                           |
| 3-OH-Kynurenine/ <i>ade16 ade17 ade8 his1</i> | 0.032 | 0.030 | 0.036 | 0.032 | 0.034 | 0.026 | 0.03 | 0.00 | 5.7E-07                                                  |                                   |

| Metabolite/Strain                               | + Ade | + Ade | + Ade | + Ade | + Ade | + Ade | Mean  | SD   | Unpaired t-test                                          | Unpaired t-test                   |
|-------------------------------------------------|-------|-------|-------|-------|-------|-------|-------|------|----------------------------------------------------------|-----------------------------------|
|                                                 |       |       |       |       |       |       |       |      | WT or <i>ade16 ade17 ade8 his1</i> vs <i>ade16 ade17</i> | WTvs <i>ade16 ade17 ade8 his1</i> |
| NAD <sup>+</sup> / WT                           | 8.8   | 10.6  | 9.9   | 10.8  | 9.8   | 10.6  | 10.08 | 0.76 | 7.9E-01                                                  |                                   |
| NAD <sup>+</sup> / <i>ade16 ade17</i>           | 9.4   | 9.9   | 10.3  | 10.4  | 9.1   | 10.7  | 9.97  | 0.62 |                                                          | 8.6E-01                           |
| NAD <sup>+</sup> / <i>ade16 ade17 ade8 his1</i> | 9.1   | 10.1  | 9.9   | 10.6  | 10.2  | 11.0  | 10.15 | 0.65 | 6.3E-01                                                  |                                   |

| Metabolite/Strain                            | + Ade | + Ade | + Ade | + Ade | + Ade | + Ade | Mean | SD   | Unpaired t-test                                          | Unpaired t-test                   |
|----------------------------------------------|-------|-------|-------|-------|-------|-------|------|------|----------------------------------------------------------|-----------------------------------|
|                                              |       |       |       |       |       |       |      |      | WT or <i>ade16 ade17 ade8 his1</i> vs <i>ade16 ade17</i> | WTvs <i>ade16 ade17 ade8 his1</i> |
| Nicotinic acid/ WT                           | 1.3   | 1.2   | 1.2   | 1.2   | 1.2   | 1.3   | 1.21 | 0.07 | 2.1E-01                                                  |                                   |
| Nicotinic acid/ <i>ade16 ade17</i>           | 1.3   | 1.3   | 1.3   | 1.2   | 1.2   | 1.2   | 1.26 | 0.05 |                                                          | 4.8E-01                           |
| Nicotinic acid/ <i>ade16 ade17 ade8 his1</i> | 1.4   | 1.2   | 1.3   | 1.2   | 1.3   | 1.2   | 1.24 | 0.07 | 6.0E-01                                                  |                                   |

|              |
|--------------|
| p>0.05       |
| 0.05<p>0.01  |
| 0.01<p>0.001 |
| p<0.001      |
