# Supplementary material for: Dual control of NAD+ synthesis by purine metabolites in yeast
Source: eLife journal article supplement (doi:10.7554/elife.43808), 2019-03-12
Supplement: supp [file elife_poa_e43808_Figure_5_source_data_2.pdf › elife_poa_e43808_Figure_5_source_data_2.pdf]

## Figure 5 G-L

*ade16 ade17 ade8 his1* quadruple knock-out strain grown in SDcawU + Adenine ± external AICAR (24 h)

### Peak area

|                   | AICAR | AICAR | AICAR   | AICAR   | AICAR   | AICAR   | AICAR | AICAR | AICAR | AICAR |
|-------------------|-------|-------|---------|---------|---------|---------|-------|-------|-------|-------|
| Metabolite        | No    | No    | 0.25 mM | 0.25 mM | 0.75 mM | 0.75 mM | 1 mM  | 1 mM  | 2 mM  | 2 mM  |
| ZMP               | ND    | ND    | 14.1    | 13.6    | 37.9    | 39.2    | 53.1  | 54.8  | 96    | 94.8  |
| SZMP              | ND    | ND    | 5.27    | 5.19    | 14.2    | 16.2    | 20.1  | 18.9  | 27.65 | 27.97 |
| Kynurenine        | 0.267 | 0.27  | 0.425   | 0.404   | 0.572   | 0.592   | 0.689 | 0.68  | 1.013 | 1.01  |
| 3-OH-Kynurenine   | 0.033 | 0.015 | 0.077   | 0.073   | 0.131   | 0.128   | 0.152 | 0.14  | 0.293 | 0.268 |
| 3-OH-Anthranilate | 0.015 | 0.008 | 0.018   | 0.015   | 0.037   | 0.033   | 0.055 | 0.053 | 0.097 | 0.075 |
| Tryptophan        | 36.8  | 35.5  | 29.6    | 29      | 26.1    | 26.7    | 26.3  | 26.1  | 23.9  | 25.1  |

ND: non-detectable
