# Supplementary material for: Dual control of NAD+ synthesis by purine metabolites in yeast
Source: eLife journal article supplement (doi:10.7554/elife.43808), 2019-03-12
Supplement: supp [file elife_poa_e43808_Figure_5_source_data_3.pdf › elife_poa_e43808_Figure_5_source_data_3.pdf]

Figure 5 O-Q  
Wild-type and *npt1* knock-out strain grown in SDcasaWU ± Adenine medium

Peak area

|                         |       |       |       |       |       |       |       |       |       |       |       |       | Mean  | Mean      | SD       | SD        | Unpaired t-test |
|-------------------------|-------|-------|-------|-------|-------|-------|-------|-------|-------|-------|-------|-------|-------|-----------|----------|-----------|-----------------|
| Metabolite / strain     | - Ade | - Ade | - Ade | - Ade | - Ade | - Ade | + Ade | + Ade | + Ade | + Ade | + Ade | + Ade | - Ade | + Ade     | - Ade    | + Ade     | - Ade vs + Ade  |
| NAD <sup>+</sup> / WT   | 19.4  | 17.3  | 21    | 20.1  | 20.9  | 21.3  | 22.8  | 21.9  | 25.4  | 24    | 24.6  | 26.2  | 20    | 24.15     | 1.493988 | 1.6046807 | 9.4E-04         |
| NAD <sup>+</sup> / npt1 | 4.5   | 5.3   | 5.3   | 5.7   | 5.7   | 5.9   | 3.7   | 3.6   | 4.2   | 4.5   | 4.6   | 4.2   | 5.4   | 4.1333333 | 0.501996 | 0.4082483 | 8.2E-04         |

|                     |       |       |       |       |       |       |       |       |       |       |       |       | Mean      | Mean      | SD        | SD        | Unpaired t-test |
|---------------------|-------|-------|-------|-------|-------|-------|-------|-------|-------|-------|-------|-------|-----------|-----------|-----------|-----------|-----------------|
| Metabolite / strain | - Ade | - Ade | - Ade | - Ade | - Ade | - Ade | + Ade | + Ade | + Ade | + Ade | + Ade | + Ade | - Ade     | + Ade     | - Ade     | + Ade     | - Ade vs + Ade  |
| ZMP / WT            | 0.8   | 1.49  | 1.5   | 1.16  | 1.67  | 1.57  | 0.052 | 0.08  | 0.068 | 0.077 | 0.065 | 0.065 | 1.365     | 0.0678333 | 0.3256225 | 0.0099883 | 1.9E-04         |
| ZMP / npt1          | 2.04  | 2.1   | 1.2   | 2.34  | 2.23  | 1.93  | 0.034 | 0.025 | 0.022 | 0.054 | 0.044 | 0.036 | 1.9733333 | 0.0358333 | 0.4051502 | 0.0119066 | 7.9E-05         |

|                     |       |       |       |       |       |       |       |       |       |       |       |       | Mean  | Mean  | SD        | SD    | Unpaired t-test |
|---------------------|-------|-------|-------|-------|-------|-------|-------|-------|-------|-------|-------|-------|-------|-------|-----------|-------|-----------------|
| Metabolite / strain | - Ade | - Ade | - Ade | - Ade | - Ade | - Ade | + Ade | + Ade | + Ade | + Ade | + Ade | + Ade | - Ade | + Ade | - Ade     | + Ade | - Ade vs + Ade  |
| SZMP / WT           | 2.5   | 4.36  | 4.26  | 3.61  | 3.83  | 4.21  | 0     | 0     | 0     | 0     | 0     | 0     | 3.795 | 0     | 0.6957226 | 0     | 4.2E-05         |
| SZMP / npt1         | 5.2   | 4.65  | 2.42  | 4.1   | 4.52  | 4.52  | 0     | 0     | 0     | 0     | 0     | 0     | 4.235 | 0     | 0.9569065 | 0     | 1.2E-04         |

0 stand for non detectable

|              |
|--------------|
| p>0.05       |
| 0.05<p>0.01  |
| 0.01<p>0.001 |
| p<0.001      |
