# Supplementary material for: Dual control of NAD+ synthesis by purine metabolites in yeast
Source: eLife journal article supplement (doi:10.7554/elife.43808), 2019-03-12
Supplement: supp [file elife_poa_e43808_Figure_6_figure_supplement_1_source_data_1.pdf › elife_poa_e43808_Figure_6_figure_supplement_1_source_data_1.pdf]

## Figure 6\_figure supplement 1

*bna2* and *bna6* knock-out strain grown in SDcasaWU ± Adenine medium

### Peak area

|                                |       |       |       |       |       |       |       |       |       |       |       |       | Mean   | Mean   | SD    | SD    | Unpaired t-test |
|--------------------------------|-------|-------|-------|-------|-------|-------|-------|-------|-------|-------|-------|-------|--------|--------|-------|-------|-----------------|
| Metabolite/Strain              | - Ade | - Ade | - Ade | - Ade | - Ade | - Ade | + Ade | + Ade | + Ade | + Ade | + Ade | + Ade | - Ade  | + Ade  | - Ade | + Ade | - Ade vs + Ade  |
| ATP/ <i>bna2</i>               | 174   | 162   | 154   | 147   | 139   | 153   | 196   | 199   | 199   | 200   | 198   | 178   | 154.83 | 195.00 | 12.12 | 8.44  | 9.6E-05         |
| NAD <sup>+</sup> / <i>bna2</i> | 6.68  | 7     | 5.97  | 6.1   | 6.5   | 6.5   | 8.1   | 8.3   | 8.2   | 9     | 9.5   | 8.1   | 6.46   | 8.53   | 0.38  | 0.58  | 5.7E-05         |

### Relative peak area (mean peak area from cells grown in the presence of adenine was set at 1 and used to calculate the relative peak areas)

|                                |       |       |       |       |       |       |       |       |       |       |       |       | Mean  | Mean  | SD    | SD    | Unpaired t-test |
|--------------------------------|-------|-------|-------|-------|-------|-------|-------|-------|-------|-------|-------|-------|-------|-------|-------|-------|-----------------|
| Metabolite/Strain              | - Ade | - Ade | - Ade | - Ade | - Ade | - Ade | + Ade | + Ade | + Ade | + Ade | + Ade | + Ade | - Ade | + Ade | - Ade | + Ade | - Ade vs + Ade  |
| ATP/ <i>bna2</i>               | 0.89  | 0.83  | 0.79  | 0.75  | 0.71  | 0.78  | 1.01  | 1.02  | 1.02  | 1.03  | 1.02  | 0.91  | 0.79  | 1.00  | 0.06  | 0.04  | 9.6E-05         |
| NAD <sup>+</sup> / <i>bna2</i> | 0.78  | 0.82  | 0.70  | 0.71  | 0.76  | 0.76  | 0.95  | 0.97  | 0.96  | 1.05  | 1.11  | 0.95  | 0.76  | 1.00  | 0.04  | 0.07  | 5.7E-05         |

### Peak area

|                  |       |       |       |       |       |       | Mean   | Mean   | SD    | SD    | Unpaired t-test |
|------------------|-------|-------|-------|-------|-------|-------|--------|--------|-------|-------|-----------------|
| Metabolite       | - Ade | - Ade | - Ade | + Ade | + Ade | + Ade | - Ade  | + Ade  | - Ade | + Ade | - Ade vs + Ade  |
| ATP              | 291   | 290   | 286   | 339   | 333   | 352   | 289.00 | 341.33 | 2.65  | 32.32 | 7.7E-03         |
| NAD <sup>+</sup> | 10.9  | 10.7  | 11.8  | 14.3  | 13.9  | 15.7  | 11.13  | 14.63  | 0.59  | 2.30  | 9.1E-03         |

|              |
|--------------|
| p>0.05       |
| 0.05<p>0.01  |
| 0.01<p>0.001 |
| p<0.001      |

### Relative peak area (mean peak area from cells grown in the presence of adenine was set at 1 and used to calculate the relative peak areas)

|                  |       |       |       |       |       |       | Mean  | Mean  | SD    | SD    | Unpaired t-test |
|------------------|-------|-------|-------|-------|-------|-------|-------|-------|-------|-------|-----------------|
| Metabolite       | - Ade | - Ade | - Ade | + Ade | + Ade | + Ade | - Ade | + Ade | - Ade | + Ade | - Ade vs + Ade  |
| ATP              | 1.46  | 1.46  | 1.44  | 1.70  | 1.67  | 1.77  | 1.45  | 1.72  | 0.01  | 0.16  | 7.7E-03         |
| NAD <sup>+</sup> | 1.31  | 1.29  | 1.42  | 1.72  | 1.67  | 1.89  | 1.34  | 1.76  | 0.07  | 0.28  | 9.1E-03         |
