# Supplementary material for: Dual control of NAD+ synthesis by purine metabolites in yeast
Source: eLife journal article supplement (doi:10.7554/elife.43808), 2019-03-12
Supplement: supp [file elife_poa_e43808_Figure_6_figure_supplement_2_source_data_1.pdf › elife_poa_e43808_Figure_6_figure_supplement_2_source_data_1.pdf]

## Figure 6\_figure supplement 2

WT and mutant strains grown in SDcasaWU-Nicotinic acid + Nicotinamide  $\pm$  Adenine medium

### Peak area

|                     |       |       |       |       |       |       |       |       | Mean  | Mean  | SD    | SD    | Unpaired t-test |
|---------------------|-------|-------|-------|-------|-------|-------|-------|-------|-------|-------|-------|-------|-----------------|
| Metabolite/Strain   | - Ade | - Ade | - Ade | - Ade | + Ade | + Ade | + Ade | + Ade | - Ade | + Ade | - Ade | + Ade | - Ade vs + Ade  |
| Nicotinic acid/WT   | 4.38  | 4.9   | 3.94  | 4.95  | 2.15  | 2.03  | 2.47  | 2.03  | 4.54  | 2.17  | 0.48  | 0.21  | 7.2E-04         |
| Nicotinic acid/npt1 | 6.2   | 7.8   | 7.15  | 7.05  | 6.18  | 6.24  | 6.95  | 6.5   | 7.05  | 6.47  | 0.66  | 0.35  | 1.8E-01         |
| Nicotinic acid/kcs1 | 2.86  | 2.95  | 2.82  |       | 2.81  | 3     | 2.94  |       | 2.88  | 2.92  | 0.07  | 0.10  | 5.9E-01         |

### Relative peak area (mean peak area from cells grown in the presence of adenine was set at 1 and used to calculate the relative peak areas)

|                     |       |       |       |       |       |       |       |       | Mean  | Mean  | SD    | SD    | Unpaired t-test |
|---------------------|-------|-------|-------|-------|-------|-------|-------|-------|-------|-------|-------|-------|-----------------|
| Metabolite/Strain   | - Ade | - Ade | - Ade | - Ade | + Ade | + Ade | + Ade | + Ade | - Ade | + Ade | - Ade | + Ade | - Ade vs + Ade  |
| Nicotinic acid/WT   | 2.02  | 2.26  | 1.82  | 2.28  | 0.99  | 0.94  | 1.14  | 0.94  | 2.09  | 1.00  | 0.22  | 0.10  | 7.2E-04         |
| Nicotinic acid/npt1 | 2.86  | 3.59  | 3.29  | 3.25  | 2.85  | 2.88  | 3.20  | 3.00  | 3.25  | 2.98  | 0.30  | 0.16  | 1.8E-01         |
| Nicotinic acid/kcs1 | 1.32  | 1.36  | 1.30  |       | 1.29  | 1.38  | 1.35  |       | 1.33  | 1.34  | 0.03  | 0.04  | 5.9E-01         |

Non-determinable for technical reasons  
mostly due to co-elution  
in some samples

p>0.05

0.05<p>0.01

0.01<p>0.001

p<0.001
