# Supplementary material for: Dual control of NAD+ synthesis by purine metabolites in yeast
Source: eLife journal article supplement (doi:10.7554/elife.43808), 2019-03-12
Supplement: supp [file elife_poa_e43808_Figure_6_source_data_1.pdf › elife_poa_e43808_Figure_6_source_data_1.pdf]

## Figure 6 A-B

WT and *kcs1* knock-out strains grown in SDcasaWU ± Adenine medium

### Peak area

|                             |       |        |       |       |        |       |       |       | Mean   | Mean   | SD    | SD    | Unpaired t-test |
|-----------------------------|-------|--------|-------|-------|--------|-------|-------|-------|--------|--------|-------|-------|-----------------|
| Metabolite/Strain           | - Ade | - Ade  | - Ade | - Ade | + Ade  | + Ade | + Ade | + Ade | - Ade  | + Ade  | - Ade | + Ade | - Ade vs + Ade  |
| Nicotinic acid/WT           | 3.43  | 3.74   | 3.43  | 3.74  | 2.3    | 2.9   | 2.3   | 2.63  | 3.59   | 2.53   | 0.18  | 0.29  | 1.6E-03         |
| Nicotinic acid/ <i>kcs1</i> | 1.67  | 2.04   | 1.91  |       | 1.66   | 2.06  |       | 1.83  | 1.87   | 1.85   | 0.19  | 0.20  | 8.9E-01         |
| ATP/WT                      | 353.2 | 359.11 | 366.4 | 381.5 | 417.96 | 452   | 416.4 | 415.6 | 365.05 | 425.49 | 12.22 | 17.70 | 2.0E-03         |
| ATP/ <i>kcs1</i>            | 801   | 858.9  | 818.9 |       | 949.7  | 922   |       | 959.4 | 826.27 | 943.70 | 29.64 | 19.41 | 7.1E-03         |

### Relative peak area (mean peak area from cells grown in the presence of adenine was set at 1 and used to calculate the relative peak areas)

|                             |       |       |       |       |       |       |       |       | Mean  | Mean  | SD    | SD    | Unpaired t-test |
|-----------------------------|-------|-------|-------|-------|-------|-------|-------|-------|-------|-------|-------|-------|-----------------|
| Metabolite/Strain           | - Ade | - Ade | - Ade | - Ade | + Ade | + Ade | + Ade | + Ade | - Ade | + Ade | - Ade | + Ade | - Ade vs + Ade  |
| Nicotinic acid/WT           | 1.35  | 1.48  | 1.35  | 1.48  | 0.91  | 1.15  | 0.91  | 1.04  | 1.42  | 1.00  | 0.07  | 0.11  | 1.6E-03         |
| Nicotinic acid/ <i>kcs1</i> | 0.66  | 0.81  | 0.75  |       | 0.66  | 0.81  |       | 0.72  | 0.74  | 0.73  | 0.07  | 0.08  | 8.9E-01         |
| ATP/WT                      | 0.83  | 0.84  | 0.86  | 0.90  | 0.98  | 1.06  | 0.98  | 0.98  | 0.86  | 1.00  | 0.03  | 0.04  | 2.0E-03         |
| ATP/ <i>kcs1</i>            | 1.88  | 2.02  | 1.92  |       | 2.23  | 2.17  |       | 2.25  | 1.94  | 2.22  | 0.07  | 0.05  | 7.1E-03         |

Non-determinable for technical reasons  
mostly due to co-elution  
in some samples

p>0.05  
0.05<p>0.01  
0.01<p>0.001  
p<0.001
