# Supplementary material for: Dual control of NAD+ synthesis by purine metabolites in yeast
Source: eLife journal article supplement (doi:10.7554/elife.43808), 2019-03-12
Supplement: supp [file elife_poa_e43808_Figure_6_source_data_2.pdf › elife_poa_e43808_Figure_6_source_data_2.pdf]

## Figure 6 C-D

Wild-type and *npt1* knock-out strain grown in SDcawU ± Adenine

### Peak area

|                              |       |       |       |       |       |       |       |       |       |       |       |       | Mean  | Mean  | SD    | SD    | Unpaired t-test |
|------------------------------|-------|-------|-------|-------|-------|-------|-------|-------|-------|-------|-------|-------|-------|-------|-------|-------|-----------------|
| Metabolite / strain          | - Ade | - Ade | - Ade | - Ade | - Ade | - Ade | + Ade | + Ade | + Ade | + Ade | + Ade | + Ade | - Ade | + Ade | - Ade | + Ade | - Ade vs + Ade  |
| Nicotinic acid / WT          | 3.68  | 3.71  | 3.6   | 3.4   | 3.67  | 3.41  | 3.05  | 3.02  | 2.85  | 3     | 2.82  | 3.04  | 3.58  | 2.96  | 0.14  | 0.10  | 9.6E-06         |
| Nicotinic acid / <i>npt1</i> | 7.01  | 6.5   | 6.5   | 6.52  | 6.47  | 6.59  | 5.75  | 7.2   | 6.07  | 5.93  | 5.89  | 6.4   | 6.60  | 6.21  | 0.21  | 0.53  | 1.4E-01         |

|                     |       |       |       |       |       |       |       |       |       |       |       |       | Mean  | Mean  | SD    | SD    | Unpaired t-test |
|---------------------|-------|-------|-------|-------|-------|-------|-------|-------|-------|-------|-------|-------|-------|-------|-------|-------|-----------------|
| Metabolite / strain | - Ade | - Ade | - Ade | - Ade | - Ade | - Ade | + Ade | + Ade | + Ade | + Ade | + Ade | + Ade | - Ade | + Ade | - Ade | + Ade | - Ade vs + Ade  |
| ATP / WT            | 352.6 | 348.2 | 356.4 | 338.4 | 350.9 | 354.3 | 389.1 | 392.2 | 399.3 | 386.4 | 413.5 | 404.7 | 350   | 398   | 6     | 10    | 8.9E-06         |
| ATP / <i>npt1</i>   | 397.3 | 386.8 | 400.2 | 370.5 | 376.3 | 397.5 | 413   | 424.2 | 406.7 | 439.1 | 417   | 431.4 | 388   | 422   | 12    | 12    | 7.4E-04         |

**Relative peak area** (mean peak area from cells grown in the presence of adenine was set at 1 and used to calculate the relative peak areas)

|                              |       |       |       |       |       |       |       |       |       |       |       |       | Mean  | Mean  | SD    | SD    | Unpaired t-test |
|------------------------------|-------|-------|-------|-------|-------|-------|-------|-------|-------|-------|-------|-------|-------|-------|-------|-------|-----------------|
| Metabolite / strain          | - Ade | - Ade | - Ade | - Ade | - Ade | - Ade | + Ade | + Ade | + Ade | + Ade | + Ade | + Ade | - Ade | + Ade | - Ade | + Ade | - Ade vs + Ade  |
| Nicotinic acid / WT          | 1.24  | 1.25  | 1.21  | 1.15  | 1.24  | 1.15  | 1.03  | 1.02  | 0.96  | 1.01  | 0.95  | 1.03  | 1.21  | 1.00  | 0.05  | 0.03  | 9.6E-06         |
| Nicotinic acid / <i>npt1</i> | 2.37  | 2.19  | 2.19  | 2.20  | 2.18  | 2.22  | 1.94  | 2.43  | 2.05  | 2.00  | 1.99  | 2.16  | 2.23  | 2.09  | 0.07  | 0.18  | 1.4E-01         |

|                     |       |       |       |       |       |       |       |       |       |       |       |       | Mean  | Mean  | SD    | SD    | Unpaired t-test |
|---------------------|-------|-------|-------|-------|-------|-------|-------|-------|-------|-------|-------|-------|-------|-------|-------|-------|-----------------|
| Metabolite / strain | - Ade | - Ade | - Ade | - Ade | - Ade | - Ade | + Ade | + Ade | + Ade | + Ade | + Ade | + Ade | - Ade | + Ade | - Ade | + Ade | - Ade vs + Ade  |
| ATP / WT            | 0.89  | 0.88  | 0.90  | 0.85  | 0.88  | 0.89  | 0.98  | 0.99  | 1.00  | 0.97  | 1.04  | 1.02  | 0.88  | 1.00  | 0.02  | 0.03  | 8.9E-06         |
| ATP / <i>npt1</i>   | 1.00  | 0.97  | 1.01  | 0.93  | 0.95  | 1.00  | 1.04  | 1.07  | 1.02  | 1.10  | 1.05  | 1.09  | 0.98  | 1.06  | 0.03  | 0.03  | 7.4E-04         |

|              |
|--------------|
| p>0.05       |
| 0.05<p>0.01  |
| 0.01<p>0.001 |
| p<0.001      |
