# Supplementary material for: Dual control of NAD+ synthesis by purine metabolites in yeast
Source: eLife journal article supplement (doi:10.7554/elife.43808), 2019-03-12
Supplement: supp [file elife_poa_e43808_Figure_7_figure_supplement_1_source_data_1.pdf › elife_poa_e43808_Figure_7_figure_supplement_1_source_data_1.pdf]

## Figure 7\_figure supplement 1

WT strain transformed by an *URA3* plasmid overexpressing (OE) the indicated gene were grown in SDcasaW (- Adenine) medium

### Peak area

## Figure 7\_figure supplement 1

|                               |       |       |       |       |       |       | Mean  | SD    | Unpaired t-test |
|-------------------------------|-------|-------|-------|-------|-------|-------|-------|-------|-----------------|
| Metabolite/overexpressed gene | - Ade | - Ade | - Ade | - Ade | - Ade | - Ade | - Ade | - Ade | OE gene vs None |
| NaMN/None                     | 0.78  | 0.34  | 0.363 | 0.56  |       | 0.66  | 0.54  | 0.19  |                 |
| NaMN/ <i>NPT1</i>             | 2.3   | 2.21  | 2.28  | 3.9   | 4.1   | 3     | 2.97  | 0.85  | 6.9E-04         |
| NaMN/ <i>NMA1</i>             | 0.065 | 0.084 | 0.087 | 0.05  | 0.054 | 0.05  | 0.07  | 0.02  | 4.8E-03         |
| NaMN/ <i>NMA2</i>             | 0.392 | 0.398 | 0.397 | 0.56  | 0.48  | 0.52  | 0.46  | 0.07  | 4.0E-01         |
| NaMN/ <i>QNS1</i>             | 0.365 | 0.417 | 0.447 | 0.58  | 0.5   | 0.59  | 0.48  | 0.09  | 5.6E-01         |

|                                 |       |       |       |       |       |       | Mean  | SD    | Unpaired t-test |
|---------------------------------|-------|-------|-------|-------|-------|-------|-------|-------|-----------------|
| Metabolite/overexpressed gene   | - Ade | - Ade | - Ade | - Ade | - Ade | - Ade | - Ade | - Ade | OE gene vs None |
| NaAD <sup>+</sup> /None         | 7.24  | 7.22  | 7.58  | 5.8   | 7     | 6.2   | 6.84  | 0.69  |                 |
| NaAD <sup>+</sup> / <i>NPT1</i> | 7.8   | 5.2   | 4.8   | 5.04  | 5.12  | 4.72  | 5.45  | 1.17  | 3.6E-02         |
| NaAD <sup>+</sup> / <i>NMA1</i> | 12.84 | 11.56 | 11.6  | 10.6  | 9.4   |       | 11.20 | 1.28  | 5.3E-04         |
| NaAD <sup>+</sup> / <i>NMA2</i> | 7.06  | 5.2   | 7.6   | 6.06  | 5.8   | 4.2   | 5.99  | 1.23  | 1.8E-01         |
| NaAD <sup>+</sup> / <i>QNS1</i> | 6.2   | 6.56  | 6.2   | 5     | 4.4   |       | 5.67  | 0.92  | 5.1E-02         |

Relative peak area (mean peak area from cells transformed with the empty vector (none) was set at 1 and used to calculate the relative peak areas)

## Figure 7\_figure supplement 1

|                               |       |       |       |       |       |       | Mean  | SD    | Unpaired t-test |
|-------------------------------|-------|-------|-------|-------|-------|-------|-------|-------|-----------------|
| Metabolite/overexpressed gene | - Ade | - Ade | - Ade | - Ade | - Ade | - Ade | - Ade | - Ade | OE gene vs None |
| NaMN/None                     | 1.44  | 0.63  | 0.67  | 1.04  |       | 1.22  | 1.00  | 0.35  |                 |
| NaMN/ <i>NPT1</i>             | 4.25  | 4.09  | 4.22  | 7.21  | 7.58  | 5.55  | 5.48  | 1.58  | 6.9E-04         |
| NaMN/ <i>NMA1</i>             | 0.12  | 0.16  | 0.16  | 0.09  | 0.10  | 0.09  | 0.12  | 0.03  | 4.8E-03         |
| NaMN/ <i>NMA2</i>             | 0.73  | 0.74  | 0.73  | 1.04  | 0.89  | 0.96  | 0.85  | 0.13  | 4.0E-01         |
| NaMN/ <i>QNS1</i>             | 0.68  | 0.77  | 0.83  | 1.07  | 0.92  | 1.09  | 0.89  | 0.17  | 5.6E-01         |

|                                 |       |       |       |       |       |       | Mean  | SD    | Unpaired t-test |
|---------------------------------|-------|-------|-------|-------|-------|-------|-------|-------|-----------------|
| Metabolite/overexpressed gene   | - Ade | - Ade | - Ade | - Ade | - Ade | - Ade | - Ade | - Ade | OE gene vs None |
| NaAD <sup>+</sup> /None         | 1.06  | 1.06  | 1.11  | 0.85  | 1.02  | 0.91  | 1.00  | 0.10  |                 |
| NaAD <sup>+</sup> / <i>NPT1</i> | 1.14  | 0.76  | 0.70  | 0.74  | 0.75  | 0.69  | 0.80  | 0.17  | 3.6E-02         |
| NaAD <sup>+</sup> / <i>NMA1</i> | 1.88  | 1.69  | 1.70  | 1.55  | 1.37  |       | 1.64  | 0.19  | 5.3E-04         |
| NaAD <sup>+</sup> / <i>NMA2</i> | 1.03  | 0.76  | 1.11  | 0.89  | 0.85  | 0.61  | 0.88  | 0.18  | 1.8E-01         |
| NaAD <sup>+</sup> / <i>QNS1</i> | 0.91  | 0.96  | 0.91  | 0.73  | 0.64  |       | 0.83  | 0.14  | 5.1E-02         |

Non-determinable for technical reasons  
mostly due to co-elution  
in some samples

p>0.05

0.05<p>0.01

0.01<p>0.001

p<0.001
