# Supplementary material for: Dual control of NAD+ synthesis by purine metabolites in yeast
Source: eLife journal article supplement (doi:10.7554/elife.43808), 2019-03-12
Supplement: supp [file elife_poa_e43808_Figure_7_figure_supplement_2_source_data_1.pdf › elife_poa_e43808_Figure_7_figure_supplement_2_source_data_1.pdf]

## Figure 7\_figure supplement 2

WT strain overexpressing *NPT1* gene and grown in SC - U ± Adenine medium

### Peak area

|                                |       |       |       |       |       |       |       |       | Mean   | Mean   | SD    | SD    | Unpaired t-test |
|--------------------------------|-------|-------|-------|-------|-------|-------|-------|-------|--------|--------|-------|-------|-----------------|
| Metabolite/OE gene             | - Ade | - Ade | - Ade | - Ade | + Ade | + Ade | + Ade | + Ade | - Ade  | + Ade  | - Ade | + Ade | - Ade vs + Ade  |
| ATP/ <i>NPT1</i>               | 327   | 296   | 271   | 267   | 441   | 416   | 425   | 450   | 290.25 | 433.00 | 27.66 | 15.34 | 3.9E-04         |
| NaMN/ <i>NPT1</i>              | 2.03  | 1.67  | 2.06  | 2.27  | 1.06  | 0.722 | 0.78  | 0.982 | 2.01   | 0.89   | 0.25  | 0.16  | 5.7E-04         |
| NAD <sup>+</sup> / <i>NPT1</i> | 17.2  | 12.5  | 15.2  | 15.7  | 19.2  | 18.5  | 21.5  | 22.7  | 15.15  | 20.48  | 1.96  | 1.96  | 8.5E-03         |

**Relative peak area** (mean peak area from cells grown in the presence of adenine was set at 1 and used to calculate the relative peak areas)

|                                |        |        |        |        |        |        |        |        | Mean  | Mean  | SD    | SD    | Unpaired t-test |
|--------------------------------|--------|--------|--------|--------|--------|--------|--------|--------|-------|-------|-------|-------|-----------------|
| Metabolite/Strain              | - Ade  | - Ade  | - Ade  | - Ade  | + Ade  | + Ade  | + Ade  | + Ade  | - Ade | + Ade | - Ade | + Ade | - Ade vs + Ade  |
| ATP/ <i>NPT1</i>               | 0.7552 | 0.6836 | 0.6259 | 0.6166 | 1.0185 | 0.9607 | 0.9815 | 1.0393 | 0.67  | 1.00  | 0.06  | 0.04  | 3.9E-04         |
| NaMN/ <i>NPT1</i>              | 2.2912 | 1.8849 | 2.3251 | 2.5621 | 1.1964 | 0.8149 | 0.8804 | 1.1084 | 2.27  | 1.00  | 0.28  | 0.18  | 5.7E-04         |
| NAD <sup>+</sup> / <i>NPT1</i> | 0.84   | 0.6105 | 0.7424 | 0.7668 | 0.9377 | 0.9035 | 1.0501 | 1.1087 | 0.74  | 1.00  | 0.10  | 0.10  | 8.5E-03         |

|              |
|--------------|
| p>0.05       |
| 0.05<p>0.01  |
| 0.01<p>0.001 |
| p<0.001      |
