# Supplementary material for: Dual control of NAD+ synthesis by purine metabolites in yeast
Source: eLife journal article supplement (doi:10.7554/elife.43808), 2019-03-12
Supplement: supp [file elife_poa_e43808_Figure_7_source_data_1.pdf › elife_poa_e43808_Figure_7_source_data_1.pdf]

## Figure 7 A-B

WT strain transformed by an *URA3* plasmid overexpressing (OE) the indicated gene were grown in SDcasaw (- Adenine) medium

Peak area

## Figure 7 A-B

| Metabolite/overexpressed gene | - Ade | - Ade | - Ade | - Ade | - Ade | - Ade | Mean<br>- Ade | SD<br>- Ade | Unpaired t-test<br>OE gene vs None |
|-------------------------------|-------|-------|-------|-------|-------|-------|---------------|-------------|------------------------------------|
| ATP/None                      | 185   | 175.4 | 146.9 | 167   | 169   | 141   | 164.05        | 16.89       |                                    |
| ATP/ <i>NPT1</i>              | 167.9 | 160   | 158   | 163   | 158   | 168   | 162.48        | 4.61        | 8.3E-01                            |
| ATP/ <i>NMA1</i>              | 165.7 | 172.7 | 159.4 | 153   | 129   |       | 155.96        | 16.75       | 4.5E-01                            |
| ATP/ <i>NMA2</i>              | 160.2 | 148.3 | 167.9 | 183   | 156   | 142   | 159.57        | 14.61       | 6.3E-01                            |
| ATP/ <i>QNS1</i>              | 161.6 | 177   | 181.4 | 181   | 151   | 140   | 165.33        | 17.33       | 9.0E-01                            |

| Metabolite/overexpressed gene  | - Ade | - Ade | - Ade | - Ade | - Ade | - Ade | Mean<br>- Ade | SD<br>- Ade | Unpaired t-test<br>OE gene vs None |
|--------------------------------|-------|-------|-------|-------|-------|-------|---------------|-------------|------------------------------------|
| NAD <sup>+</sup> /None         | 8.5   | 8.49  | 9.89  | 8.8   | 9.8   | 9.3   | 9.13          | 0.63        |                                    |
| NAD <sup>+</sup> / <i>NPT1</i> | 11.9  | 9.16  | 8.4   | 7.97  | 9.3   | 8.8   | 9.26          | 1.39        | 8.5E-01                            |
| NAD <sup>+</sup> / <i>NMA1</i> | 14.3  | 14.03 | 14.87 | 13.9  | 12.2  | 13.8  | 13.85         | 0.89        | 2.3E-06                            |
| NAD <sup>+</sup> / <i>NMA2</i> | 10.5  | 8.97  | 10.6  | 10.3  | 9.8   | 8.5   | 9.78          | 0.87        | 1.7E-01                            |
| NAD <sup>+</sup> / <i>QNS1</i> | 9.45  | 9.4   | 9.57  | 9.9   | 9.6   | 9.7   | 9.60          | 0.18        | 1.3E-01                            |

Relative peak area (mean peak area from cells transformed with the empty vector (none) was set at 1 and used to calculate the relative peak areas)

## Figure 7 A-B

| Metabolite/overexpressed gene | - Ade | - Ade | - Ade | - Ade | - Ade | - Ade | Mean<br>- Ade | SD<br>- Ade | Unpaired t-test<br>OE gene vs None |
|-------------------------------|-------|-------|-------|-------|-------|-------|---------------|-------------|------------------------------------|
| ATP/None                      | 1.13  | 1.07  | 0.90  | 1.02  | 1.03  | 0.86  | 1.00          | 0.10        |                                    |
| ATP/ <i>NPT1</i>              | 1.02  | 0.98  | 0.96  | 0.99  | 0.96  | 1.02  | 0.99          | 0.03        | 8.3E-01                            |
| ATP/ <i>NMA1</i>              | 1.01  | 1.05  | 0.97  | 0.93  | 0.79  |       | 0.95          | 0.10        | 4.5E-01                            |
| ATP/ <i>NMA2</i>              | 0.98  | 0.90  | 1.02  | 1.12  | 0.95  | 0.87  | 0.97          | 0.09        | 6.3E-01                            |
| ATP/ <i>QNS1</i>              | 0.99  | 1.08  | 1.11  | 1.10  | 0.92  | 0.85  | 1.01          | 0.11        | 9.0E-01                            |

| Metabolite/overexpressed gene  | - Ade | - Ade | - Ade | - Ade | - Ade | - Ade | Mean<br>- Ade | SD<br>- Ade | Unpaired t-test<br>OE gene vs None |
|--------------------------------|-------|-------|-------|-------|-------|-------|---------------|-------------|------------------------------------|
| NAD <sup>+</sup> /None         | 0.93  | 0.93  | 1.08  | 0.96  | 1.07  | 1.02  | 1.00          | 0.07        |                                    |
| NAD <sup>+</sup> / <i>NPT1</i> | 1.30  | 1.00  | 0.92  | 0.87  | 1.02  | 0.96  | 1.01          | 0.15        | 8.5E-01                            |
| NAD <sup>+</sup> / <i>NMA1</i> | 1.57  | 1.54  | 1.63  | 1.52  | 1.34  | 1.51  | 1.52          | 0.10        | 2.3E-06                            |
| NAD <sup>+</sup> / <i>NMA2</i> | 1.15  | 0.98  | 1.16  | 1.13  | 1.07  | 0.93  | 1.07          | 0.09        | 1.7E-01                            |
| NAD <sup>+</sup> / <i>QNS1</i> | 1.04  | 1.03  | 1.05  | 1.08  | 1.05  | 1.06  | 1.05          | 0.02        | 1.3E-01                            |

Non-determinable for technical reasons  
mostly due to co-elution  
in some samples

p>0.05

0.05<p>0.01

0.01<p>0.001

p<0.001
