# Supplementary material for: Dual control of NAD+ synthesis by purine metabolites in yeast
Source: eLife journal article supplement (doi:10.7554/elife.43808), 2019-03-12
Supplement: supp [file elife_poa_e43808_Figure_7_source_data_2.pdf › elife_poa_e43808_Figure_7_source_data_2.pdf]

**Figure 7 C-D**

WT, *nma1* and *nma2* knock-out strains grown in SDcasaWU medium ± Adenine

**Peak area**

|                   |       |       |       |       |       |       |       |       |       |       |       |       |        | Mean   | Mean  | SD    | SD      | Unpaired t-test | Unpaired t-test    | Unpaired t-test    |
|-------------------|-------|-------|-------|-------|-------|-------|-------|-------|-------|-------|-------|-------|--------|--------|-------|-------|---------|-----------------|--------------------|--------------------|
| Metabolite/Strain | - Ade | - Ade | - Ade | - Ade | - Ade | - Ade | - Ade | + Ade | + Ade | + Ade | + Ade | + Ade | + Ade  | - Ade  | + Ade | - Ade | + Ade   | - Ade vs + Ade  | mutant vs WT - Ade | mutant vs WT + Ade |
| ATP/WT            | 355   | 334.5 | 329   | 332.9 | 344   | 341.6 | 386   | 410.5 | 368   | 379   | 374.6 | 378.2 | 339.50 | 382.72 | 9.42  | 14.83 | 2.5E-04 |                 |                    |                    |
| ATP/ <i>nma1</i>  | 354   | 339.5 | 359   | 367   | 349   | 361   | 369   | 380.2 | 410   | 397.5 | 400.9 | 387.5 | 354.92 | 390.85 | 9.73  | 14.93 | 9.2E-04 | 1.9E-02         | 3.7E-01            |                    |
| ATP/ <i>nma2</i>  | 324   | 335.5 | 337   | 319   | 319   | 342   |       | 370   | 379   | 389   | 382.5 | 388.9 | 329.42 | 381.88 | 9.99  | 7.90  | 4.6E-06 | 1.0E-01         | 9.1E-01            |                    |

  

|                                |       |       |       |       |       |       |       |       |       |       |       |       |       | Mean  | Mean  | SD    | SD      | Unpaired t-test | Unpaired t-test    | Unpaired t-test    |
|--------------------------------|-------|-------|-------|-------|-------|-------|-------|-------|-------|-------|-------|-------|-------|-------|-------|-------|---------|-----------------|--------------------|--------------------|
| Metabolite/Strain              | - Ade | - Ade | - Ade | - Ade | - Ade | - Ade | - Ade | + Ade | + Ade | + Ade | + Ade | + Ade | + Ade | - Ade | + Ade | - Ade | + Ade   | - Ade vs + Ade  | mutant vs WT - Ade | mutant vs WT + Ade |
| NAD <sup>+</sup> /WT           | 17.6  | 20.9  | 21.5  | 20.6  | 22.2  | 21.4  | 22.6  | 24.6  | 22.9  | 22.8  | 24    | 22.8  | 20.70 | 23.28 | 1.61  | 0.82  | 9.2E-03 |                 |                    |                    |
| NAD <sup>+</sup> / <i>nma1</i> | 11.05 | 13.8  | 13.4  | 14.7  | 13.7  | 14.8  | 13.1  | 14.6  | 15.6  | 14.8  | 14.5  | 14.3  | 13.58 | 14.48 | 1.36  | 0.81  | 2.0E-01 | 1.1E-05         | 4.1E-09            |                    |
| NAD <sup>+</sup> / <i>nma2</i> | 18.1  | 19.8  | 20    | 18.7  | 18.5  | 19.2  |       | 21    | 23.6  | 22.5  | 23.1  | 22.2  | 19.05 | 22.48 | 0.75  | 0.99  | 3.0E-04 | 5.7E-02         | 1.9E-01            |                    |

**Relative peak area** (mean peak area from wild-type cells grown in the presence of adenine was set at 1 and used to calculate the relative peak areas)

|                   |        |        |        |        |        |        |        |        |        |        |        |        |       | Mean  | Mean  | SD    | SD      | Unpaired t-test | Unpaired t-test    | Unpaired t-test    |
|-------------------|--------|--------|--------|--------|--------|--------|--------|--------|--------|--------|--------|--------|-------|-------|-------|-------|---------|-----------------|--------------------|--------------------|
| Metabolite/Strain | - Ade  | - Ade  | - Ade  | - Ade  | - Ade  | - Ade  | - Ade  | + Ade  | + Ade  | + Ade  | + Ade  | + Ade  | + Ade | - Ade | + Ade | - Ade | + Ade   | - Ade vs + Ade  | mutant vs WT - Ade | mutant vs WT + Ade |
| ATP/WT            | 0.9276 | 0.874  | 0.8596 | 0.8698 | 0.8988 | 0.8926 | 1.0086 | 1.0726 | 0.9615 | 0.9903 | 0.9788 | 0.9882 | 0.89  | 1.00  | 0.02  | 0.04  | 2.5E-04 |                 |                    |                    |
| ATP/ <i>nma1</i>  | 0.925  | 0.8871 | 0.938  | 0.9589 | 0.9119 | 0.9433 | 0.9642 | 0.9934 | 1.0713 | 1.0386 | 1.0475 | 1.0125 | 0.93  | 1.02  | 0.03  | 0.04  | 9.2E-04 | 1.9E-02         | 3.7E-01            |                    |
| ATP/ <i>nma2</i>  | 0.8466 | 0.8766 | 0.8805 | 0.8335 | 0.8335 | 0.8936 |        | 0.9668 | 0.9903 | 1.0164 | 0.9994 | 1.0162 | 0.86  | 1.00  | 0.03  | 0.02  | 4.6E-06 | 1.0E-01         | 9.1E-01            |                    |

  

|                                |        |        |        |        |        |        |        |        |        |        |        |        |       | Mean  | Mean  | SD    | SD      | Unpaired t-test | Unpaired t-test    | Unpaired t-test    |
|--------------------------------|--------|--------|--------|--------|--------|--------|--------|--------|--------|--------|--------|--------|-------|-------|-------|-------|---------|-----------------|--------------------|--------------------|
| Metabolite/Strain              | - Ade  | - Ade  | - Ade  | - Ade  | - Ade  | - Ade  | - Ade  | + Ade  | + Ade  | + Ade  | + Ade  | + Ade  | + Ade | - Ade | + Ade | - Ade | + Ade   | - Ade vs + Ade  | mutant vs WT - Ade | mutant vs WT + Ade |
| NAD <sup>+</sup> /WT           | 0.7559 | 0.8976 | 0.9234 | 0.8848 | 0.9535 | 0.9191 | 0.9707 | 1.0565 | 0.9835 | 0.9792 | 1.0308 | 0.9792 | 0.89  | 1.00  | 0.07  | 0.04  | 9.2E-03 |                 |                    |                    |
| NAD <sup>+</sup> / <i>nma1</i> | 0.4746 | 0.5927 | 0.5755 | 0.6314 | 0.5884 | 0.6356 | 0.5626 | 0.6271 | 0.67   | 0.6356 | 0.6228 | 0.6142 | 0.58  | 0.62  | 0.06  | 0.03  | 2.0E-01 | 1.1E-05         | 4.1E-09            |                    |
| NAD <sup>+</sup> / <i>nma2</i> | 0.7774 | 0.8504 | 0.859  | 0.8031 | 0.7946 | 0.8246 |        | 0.9019 | 1.0136 | 0.9664 | 0.9921 | 0.9535 | 0.82  | 0.97  | 0.03  | 0.04  | 3.0E-04 | 5.7E-02         | 1.9E-01            |                    |

Non-determinable for technical reasons  
mostly due to co-elution  
in some samples

|              |
|--------------|
| p>0.05       |
| 0.05<p>0.01  |
| 0.01<p>0.001 |
| p<0.001      |
