# Supplementary material for: Dual control of NAD+ synthesis by purine metabolites in yeast
Source: eLife journal article supplement (doi:10.7554/elife.43808), 2019-03-12
Supplement: supp [file elife_poa_e43808_Figure_7_source_data_3.pdf › elife_poa_e43808_Figure_7_source_data_3.pdf]

Figure 7 E-F

WT strain overexpressing (OE) or not (vector) NMA1 gene and grown in SDcasaW ± Adenine medium

Peak area

| Metabolite/OE gene | - Ade | - Ade | - Ade | - Ade | + Ade | + Ade | + Ade | + Ade | Mean   | Mean   | SD    | SD    | Unpaired t-test | Unpaired t-test    | Unpaired t-test    |
|--------------------|-------|-------|-------|-------|-------|-------|-------|-------|--------|--------|-------|-------|-----------------|--------------------|--------------------|
|                    | - Ade | - Ade | - Ade | - Ade | + Ade | + Ade | + Ade | + Ade | - Ade  | + Ade  | - Ade | + Ade | - Ade vs + Ade  | mutant vs WT - Ade | mutant vs WT + Ade |
| ATP/No             | 196   | 181.1 | 196.2 | 202   | 222.9 | 218.7 | 207.5 | 217.7 | 193.83 | 216.70 | 8.93  | 6.53  | 7.4E-03         |                    |                    |
| ATP/NMA1           | 186   | 196.6 | 200.2 | 205   | 217.5 | 223.4 | 211.8 | 216.3 | 196.95 | 217.25 | 8.07  | 4.78  | 8.0E-03         | 6.2E-01            | 9.0E-01            |

| Metabolite/OE gene     | - Ade | - Ade | - Ade | - Ade | + Ade | + Ade | + Ade | + Ade | Mean  | Mean  | SD    | SD    | Unpaired t-test | Unpaired t-test    | Unpaired t-test    |
|------------------------|-------|-------|-------|-------|-------|-------|-------|-------|-------|-------|-------|-------|-----------------|--------------------|--------------------|
|                        | - Ade | - Ade | - Ade | - Ade | + Ade | + Ade | + Ade | + Ade | - Ade | + Ade | - Ade | + Ade | - Ade vs + Ade  | mutant vs WT - Ade | mutant vs WT + Ade |
| NAD <sup>+</sup> /No   | 9.16  | 9.8   | 10.8  | 10.4  | 11.8  | 11.2  | 12.8  | 12.4  | 10.04 | 12.05 | 0.72  | 0.70  | 7.0E-03         |                    |                    |
| NAD <sup>+</sup> /NMA1 | 11.9  | 14.2  | 13.7  | 14.3  | 15    | 16.75 | 16.3  | 17.3  | 13.53 | 16.34 | 1.11  | 0.98  | 9.4E-03         | 3.1E-03            | 6.0E-04            |

Relative peak area (mean peak area from wild-type cells transformed with the empty vector (No) and grown in the presence of adenine was set at 1 and used to calculate the relative peak areas)

| Metabolite/OE gene | - Ade  | - Ade  | - Ade  | - Ade  | + Ade  | + Ade  | + Ade  | + Ade  | Mean  | Mean  | SD    | SD    | Unpaired t-test | Unpaired t-test    | Unpaired t-test    |
|--------------------|--------|--------|--------|--------|--------|--------|--------|--------|-------|-------|-------|-------|-----------------|--------------------|--------------------|
|                    | - Ade  | - Ade  | - Ade  | - Ade  | + Ade  | + Ade  | + Ade  | + Ade  | - Ade | + Ade | - Ade | + Ade | - Ade vs + Ade  | mutant vs WT - Ade | mutant vs WT + Ade |
| ATP/No             | 0.9045 | 0.8357 | 0.9054 | 0.9322 | 1.0286 | 1.0092 | 0.9575 | 1.0046 | 0.89  | 1.00  | 0.04  | 0.03  | 7.4E-03         |                    |                    |
| ATP/NMA1           | 0.8583 | 0.9072 | 0.9239 | 0.946  | 1.0037 | 1.0309 | 0.9774 | 0.9982 | 0.91  | 1.00  | 0.04  | 0.02  | 8.0E-03         | 6.2E-01            | 9.0E-01            |

| Metabolite/OE gene     | - Ade  | - Ade  | - Ade  | - Ade  | + Ade  | + Ade  | + Ade  | + Ade  | Mean  | Mean  | SD    | SD    | Unpaired t-test | Unpaired t-test    | Unpaired t-test    |
|------------------------|--------|--------|--------|--------|--------|--------|--------|--------|-------|-------|-------|-------|-----------------|--------------------|--------------------|
|                        | - Ade  | - Ade  | - Ade  | - Ade  | + Ade  | + Ade  | + Ade  | + Ade  | - Ade | + Ade | - Ade | + Ade | - Ade vs + Ade  | mutant vs WT - Ade | mutant vs WT + Ade |
| NAD <sup>+</sup> /No   | 0.7602 | 0.8133 | 0.8963 | 0.8631 | 0.9793 | 0.9295 | 1.0622 | 1.029  | 0.83  | 1.00  | 0.06  | 0.06  | 7.0E-03         |                    |                    |
| NAD <sup>+</sup> /NMA1 | 0.9876 | 1.1784 | 1.1369 | 1.1867 | 1.2448 | 1.39   | 1.3527 | 1.4357 | 1.12  | 1.36  | 0.09  | 0.08  | 9.4E-03         | 3.1E-03            | 6.0E-04            |

|              |
|--------------|
| p>0.05       |
| 0.05<p>0.01  |
| 0.01<p>0.001 |
| p<0.001      |
