# Supplementary material for: Dual control of NAD+ synthesis by purine metabolites in yeast
Source: eLife journal article supplement (doi:10.7554/elife.43808), 2019-03-12
Supplement: supp [file elife_poa_e43808_Figure_8_figure_supplement_1_source_data_1.pdf › elife_poa_e43808_Figure_8_figure_supplement_1_source_data_1.pdf]

Figure 8 \_ figure supplement 1  
bna2 knock-out strains grown in SDcasaWU medium ± Adenine

Peak area

| Metabolite        | - Ade | - Ade | - Ade | - Ade | - Ade | - Ade | - Ade | - Ade | - Ade | - Ade | - Ade | - Ade | - Ade | - Ade | - Ade | + Ade | + Ade | + Ade | + Ade | + Ade | + Ade | + Ade | + Ade | + Ade | + Ade | + Ade | + Ade | + Ade | + Ade | + Ade | Mean  | Mean  | SD      | SD    | Unpaired t-test |
|-------------------|-------|-------|-------|-------|-------|-------|-------|-------|-------|-------|-------|-------|-------|-------|-------|-------|-------|-------|-------|-------|-------|-------|-------|-------|-------|-------|-------|-------|-------|-------|-------|-------|---------|-------|-----------------|
|                   | - Ade | - Ade | - Ade | - Ade | - Ade | - Ade | - Ade | - Ade | - Ade | - Ade | - Ade | - Ade | - Ade | - Ade | - Ade | + Ade | + Ade | + Ade | + Ade | + Ade | + Ade | + Ade | + Ade | + Ade | + Ade | + Ade | + Ade | + Ade | + Ade | + Ade | - Ade | + Ade | - Ade   | + Ade | - Ade vs + Ade  |
| ATP               | 178   | 187   | 160   | 162   | 174   | 174   | 197   | 198   | 222   | 204   | 207   | 188   | 207   | 217   | 217   | 222   | 219   | 240   | 254   | 217   | 216   | 229   | 213   | 251   | 226   | 247   | 225   | 222   | 191   | 228   | 19.53 | 13.77 | 5.5E-06 |       |                 |
| Nicotinic Acid    | 4.12  | 4.22  | 4.22  | 4.42  | 4.32  | 4.42  | 4.37  | 4.37  |       |       |       |       |       |       |       | 4.12  | 3.92  | 3.57  | 4.22  | 3.98  | 4.20  | 3.82  | 3.72  |       |       |       |       |       | 4.31  | 3.94  | 0.11  | 0.23  | 2.6E-03 |       |                 |
| NaMN              | 0.35  | 0.47  | 0.49  | 0.39  | 0.39  | 0.41  | 0.47  | 0.44  |       |       |       |       |       |       |       | 0.23  | 0.32  | 0.28  | 0.29  | 0.28  | 0.32  | 0.31  | 0.34  |       |       |       |       |       | 0.43  | 0.30  | 0.05  | 0.03  | 4.2E-05 |       |                 |
| NaAD <sup>+</sup> | 8.36  | 8.46  | 6.87  | 6.97  | 7.07  | 7.36  | 6.87  | 7.66  | 6.58  | 7.27  | 7.45  | 6.84  | 6.75  | 7.53  | 10.00 | 9.85  | 6.87  | 8.46  | 7.66  | 9.95  | 8.81  | 6.97  | 7.71  | 8.31  | 9.87  | 8.40  | 8.31  | 8.83  | 7.29  | 8.57  | 0.57  | 1.06  | 7.3E-04 |       |                 |
| NAD <sup>+</sup>  | 6.48  | 8.18  | 9.28  | 9.18  | 7.88  | 9.47  | 9.18  | 9.18  | 7.68  | 8.08  | 6.89  | 6.99  | 7.48  | 7.48  | 8.98  | 8.58  | 8.98  | 11.97 | 9.47  | 11.17 | 10.17 | 9.47  | 9.36  | 9.55  | 9.45  | 10.34 | 10.93 | 9.36  | 8.10  | 9.84  | 1.00  | 0.96  | 7.5E-05 |       |                 |

Relative peak area

| Metabolite        | - Ade | - Ade | - Ade | - Ade | - Ade | - Ade | - Ade | - Ade | - Ade | - Ade | - Ade | - Ade | - Ade | - Ade | - Ade | + Ade | + Ade | + Ade | + Ade | + Ade | + Ade | + Ade | + Ade | + Ade | + Ade | + Ade | + Ade | + Ade | + Ade | Mean  | Mean  | SD    | SD      | Unpaired t-test |
|-------------------|-------|-------|-------|-------|-------|-------|-------|-------|-------|-------|-------|-------|-------|-------|-------|-------|-------|-------|-------|-------|-------|-------|-------|-------|-------|-------|-------|-------|-------|-------|-------|-------|---------|-----------------|
|                   | - Ade | - Ade | - Ade | - Ade | - Ade | - Ade | - Ade | - Ade | - Ade | - Ade | - Ade | - Ade | - Ade | - Ade | - Ade | + Ade | + Ade | + Ade | + Ade | + Ade | + Ade | + Ade | + Ade | + Ade | + Ade | + Ade | + Ade | + Ade | + Ade | - Ade | + Ade | - Ade | + Ade   | - Ade vs + Ade  |
| ATP               | 0.78  | 0.82  | 0.70  | 0.71  | 0.76  | 0.76  | 0.86  | 0.87  | 0.97  | 0.89  | 0.91  | 0.82  | 0.90  | 0.95  | 0.95  | 0.97  | 0.96  | 1.05  | 1.11  | 0.95  | 0.94  | 1.00  | 0.93  | 1.10  | 0.99  | 1.08  | 0.99  | 0.97  | 0.84  | 1.00  | 0.09  | 0.06  | 5.5E-06 |                 |
| Nicotinic Acid    | 1.04  | 1.07  | 1.07  | 1.12  | 1.10  | 1.12  | 1.11  | 1.11  |       |       |       |       |       |       |       | 1.04  | 0.99  | 0.90  | 1.07  | 1.01  | 1.07  | 0.97  | 0.94  |       |       |       |       |       | 1.09  | 1.00  | 0.03  | 0.06  | 2.6E-03 |                 |
| NaMN              | 1.18  | 1.58  | 1.65  | 1.31  | 1.31  | 1.38  | 1.58  | 1.50  |       |       |       |       |       |       |       | 0.77  | 1.08  | 0.94  | 0.99  | 0.94  | 1.08  | 1.04  | 1.15  |       |       |       |       |       | 1.44  | 1.00  | 0.17  | 0.11  | 4.2E-05 |                 |
| NaAD <sup>+</sup> | 0.98  | 0.99  | 0.80  | 0.81  | 0.82  | 0.86  | 0.80  | 0.89  | 0.77  | 0.85  | 0.87  | 0.80  | 0.79  | 0.88  | 1.17  | 1.15  | 0.80  | 0.99  | 0.89  | 1.16  | 1.03  | 0.81  | 0.90  | 0.97  | 1.15  | 0.98  | 0.97  | 1.03  | 0.85  | 1.00  | 0.07  | 0.12  | 7.3E-04 |                 |
| NAD <sup>+</sup>  | 0.66  | 0.83  | 0.94  | 0.93  | 0.80  | 0.96  | 0.93  | 0.93  | 0.78  | 0.82  | 0.70  | 0.71  | 0.76  | 0.76  | 0.91  | 0.87  | 0.91  | 1.22  | 0.96  | 1.13  | 1.03  | 0.96  | 0.95  | 0.97  | 0.96  | 1.05  | 1.11  | 0.95  | 0.82  | 1.00  | 0.10  | 0.10  | 7.5E-05 |                 |

|              |
|--------------|
| p>0.05       |
| 0.05<p>0.01  |
| 0.01<p>0.001 |
| p<0.001      |
