# Supplementary material for: Dual control of NAD+ synthesis by purine metabolites in yeast
Source: eLife journal article supplement (doi:10.7554/elife.43808), 2019-03-12
Supplement: supp [file elife_poa_e43808_Figure_8_source_data_1.pdf › elife_poa_e43808_Figure_8_source_data_1.pdf]

## Figure 8 A-D

FY4 prototrophic wild-type strain grown in SDcswU ± Adenine medium

### Peak area

|            |       |       |       |       |       |       |       |       |       |       |       |       |       |       |       | Mean   | SD    | Mean   | SD    | Unpaired t-test |
|------------|-------|-------|-------|-------|-------|-------|-------|-------|-------|-------|-------|-------|-------|-------|-------|--------|-------|--------|-------|-----------------|
| Metabolite | - Ade | - Ade | - Ade | - Ade | - Ade | - Ade | - Ade | - Ade | + Ade | + Ade | + Ade | + Ade | + Ade | + Ade | + Ade | - Ade  | - Ade | + Ade  | + Ade | - Ade vs + Ade  |
| NaMN       | 0.46  | 0.46  | 0.64  | 0.63  | 0.58  | 0.54  | 0.6   | 0.72  | 0.35  | 0.43  | 0.5   | 0.44  | 0.44  | 0.52  | 0.48  | 0.58   | 0.07  | 0.45   | 0.04  | 6.0E-03         |
| NaAD+      | 13    | 16.6  | 20    | 11.6  | 18    | 17.8  | 18    | 14.8  | 22.2  | 21    | 25    | 21.2  | 23.4  | 24.4  | 24.2  | 16.23  | 2.32  | 23.06  | 1.36  | 1.1E-04         |
| NAD+       | 9.8   | 10.8  | 13.3  | 11.7  | 13.6  | 13.3  | 13.9  | 11.9  | 16.1  | 13.5  | 16.5  | 14.6  | 15.5  | 16.5  | 15.5  | 12.29  | 1.24  | 15.46  | 0.80  | 4.0E-04         |
| ATP        | 322   | 287   | 337   | 319   | 293   | 313   | 289   | 297   | 353   | 344   | 367   | 336   | 353   | 363   | 359   | 307.13 | 15.63 | 353.57 | 8.08  | 6.3E-05         |

### Relative peak area (mean peak area from cells grown in the presence of adenine was set at 1 and used to calculate the relative peak areas)

|            |       |       |       |       |       |       |       |       |       |       |       |       |       |       |       | Mean  | SD    | Mean  | SD    | Unpaired t-test |
|------------|-------|-------|-------|-------|-------|-------|-------|-------|-------|-------|-------|-------|-------|-------|-------|-------|-------|-------|-------|-----------------|
| Metabolite | - Ade | - Ade | - Ade | - Ade | - Ade | - Ade | - Ade | - Ade | + Ade | + Ade | + Ade | + Ade | + Ade | + Ade | + Ade | - Ade | - Ade | + Ade | + Ade | - Ade vs + Ade  |
| NaMN       | 1.02  | 1.02  | 1.42  | 1.40  | 1.28  | 1.20  | 1.33  | 1.59  | 0.78  | 0.95  | 1.11  | 0.97  | 0.97  | 1.15  | 1.06  | 1.28  | 0.20  | 1.00  | 0.12  | 6.0E-03         |
| NaAD+      | 0.56  | 0.72  | 0.87  | 0.50  | 0.78  | 0.77  | 0.78  | 0.64  | 0.96  | 0.91  | 1.08  | 0.92  | 1.01  | 1.06  | 1.05  | 0.70  | 0.12  | 1.00  | 0.07  | 1.1E-04         |
| NAD+       | 0.63  | 0.70  | 0.86  | 0.76  | 0.88  | 0.86  | 0.90  | 0.77  | 1.04  | 0.87  | 1.07  | 0.94  | 1.00  | 1.07  | 1.00  | 0.79  | 0.10  | 1.00  | 0.07  | 4.0E-04         |
| ATP        | 0.91  | 0.81  | 0.95  | 0.90  | 0.83  | 0.89  | 0.82  | 0.84  | 1.00  | 0.97  | 1.04  | 0.95  | 1.00  | 1.03  | 1.02  | 0.87  | 0.05  | 1.00  | 0.03  | 6.3E-05         |

|              |
|--------------|
| p>0.05       |
| 0.05<p>0.01  |
| 0.01<p>0.001 |
| p<0.001      |
